# Supplementary material for: d-Fructose-derived β-amino alcohol catalyzed direct asymmetric aldol reaction in the presence of p-nitrophenol
Source: Royal Society of Chemistry journal article supplement (doi:10.1039/c3ra42029a), 2013-01-01
Supplement: c3ra42029a.pdf [file c3ra42029a.pdf]

## Supplementary Information

### **D-Fructose derived $\beta$ -amino alcohol-catalyzed direct asymmetric aldol reaction in the presence of *p*-nitrophenol**

Longxia Li<sup>a</sup>, Zhijie Fang<sup>a\*</sup>, Jie Fang<sup>a,b</sup>, Jianguang Zhou<sup>b</sup> and Yanfei Xiang<sup>a</sup>

<sup>a</sup> *School of Chemical Engineering, Nanjing University of Science & Technology,  
Nanjing, 210094, China, Fax: +86-025-84316903 E-mail: [zifang@njust.edu.cn](mailto:zifang@njust.edu.cn).*

<sup>b</sup> *Chemical and Analytical Development, Suzhou Novartis Pharma Technology  
Company Limited, Changshu, 215537, China*

---

\* Corresponding author Tel.&Fax: +86-025-84316903; E-mail: [zifang@njust.edu.cn](mailto:zifang@njust.edu.cn) (Z-J. Fang).

## Supporting information

**Table 1: HPLC data for aldol products**

| S.No | Aldol Product | <sup>1</sup> H NMR (CDCl <sub>3</sub> -CH <sub>2</sub> OH, δ) |      | HPLC data      |        |           |                    |                  |                  |                  |                  |
|------|---------------|---------------------------------------------------------------|------|----------------|--------|-----------|--------------------|------------------|------------------|------------------|------------------|
|      |               | syn                                                           | anti | Column         | λ (nm) | Flow rate | Solvent IPA:Hex    | Syn product      |                  | Anti product     |                  |
|      |               |                                                               |      |                |        |           |                    | <i>t</i> R (min) | <i>t</i> R (min) | <i>t</i> R (min) | <i>t</i> R (min) |
| 1.   | <b>6a</b>     | 5.49                                                          | 4.83 | Chiralpak AD-3 | 254    | 1mL/min   | 90:10              | 10.80            | 11.75            | 13.14            | 16.46            |
| 2.   | <b>6b</b>     | 5.97                                                          | 5.45 | Chiralpak AD-3 | 254    | 1mL/min   | 95:5               | 7.78             | 11.24            | 13.52            | 14.56            |
| 3.   | <b>6c</b>     | 5.49                                                          | 4.90 | Chiralpak AD-3 | 254    | 1mL/min   | 95:5               | 21.24            | 28.21            | 30.97            | 41.99            |
| 4.   | <b>6d</b>     | 5.85                                                          | 5.37 | Chiralpak AD-3 | 254    | 1mL/min   | 95:5               | 16.16            | 17.91            | 21.23            | 23.06            |
| 5.   | <b>6e</b>     | 5.34                                                          | 4.77 | Chiralpak AD-3 | 254    | 1mL/min   | 95:5               | 19.77            | 22.03            | 24.95            | 38.02            |
| 6.   | <b>6f</b>     | 5.43                                                          | 4.85 | Chiralpak AD-3 | 254    | 1mL/min   | 95:5               | 17.85            | 24.50            | 30.38            | 31.23            |
| 7.   | <b>6g</b>     | 5.30                                                          | 4.85 | Chiralpak AD-3 | 254    | 1mL/min   | 95:5               | 14.87            | 17.04            | 23.21            | 24.66            |
| 8.   | <b>6h</b>     | 5.30                                                          | 4.68 | Chiralpak AD-3 | 220    | 1mL/min   | 90:10              | 10.36            | 11.88            | 15.77            | 17.37            |
| 9.   | <b>6i</b>     | 5.36                                                          | 4.68 | Chiralpak AD-3 | 220    | 1mL/min   | 90:10              | 11.24            | 13.10            | 17.26            | 19.95            |
| 10.  | <b>6j</b>     | 5.35                                                          | 4.77 | Chiralpak AD-3 | 210    | 1mL/min   | 90:10              | 10.87            | 12.09            | 16.80            | 17.74            |
| 11.  | <b>6k</b>     | 5.35                                                          | 4.74 | Chiralpak AD-3 | 220    | 1mL/min   | 90:10              | 11.76            | 13.93            | 18.61            | 21.75            |
| 12.  | <b>6l</b>     | 5.33                                                          | 4.75 | Chiralpak AD-3 | 210    | 1mL/min   | 90:10              | 10.90            | 12.49            | 16.51            | 18.28            |
| 13.  | <b>6m</b>     | 5.41                                                          | 4.85 | Chiralpak IA-3 | 210    | 1.5mL/min | 90:10 <sup>a</sup> | 7.76             | 11.23            | 13.52            | 14.56            |
| 14.  | <b>6n</b>     | 5.37                                                          | 4.76 | Chiralpak AD-3 | 220    | 1mL/min   | 90:10              | 8.08             | 9.08             | 13.34            | 14.56            |

<sup>a</sup> hextane/EtOH=90:10

### NMR data for aldol products 6a-n

**2-[Hydroxy-(3-nitro-phenyl)-methyl]-cyclohexanone (6a)**<sup>[1]</sup>: *syn*-diastereomer, <sup>1</sup>H NMR (400 MHz, CDCl<sub>3</sub>) δ (ppm) 1.54-2.17 (m, 6H), 2.35-2.53 (m, 2H), 2.61-2.2.70 (m, 1H), 3.2(d, *J* = 4 Hz, 1H), 5.49 (s, 1H), 7.52 (t, *J* = 8 Hz, 1H), 7.65 (d, *J* = 8 Hz, 1H), 8.12 (d, *J* = 8 Hz, 1H), 8.19 (s, 1H); <sup>13</sup>C NMR (100 MHz, CDCl<sub>3</sub>) δ (ppm) 24.7, 25.9, 27.9, 42.6, 56.7, 69.9, 120.9, 122.1, 129.2, 131.9, 143.7, 148.3, 214.3; *anti*-diastereomer, [α]<sub>D</sub><sup>23</sup> + 23.4 (c 1, CDCl<sub>3</sub>; 87% ee) <sup>1</sup>H NMR (400 MHz, CDCl<sub>3</sub>) δ (ppm) 1.47-2.09 (m, 6H), 2.25-2.36 (m, 1H), 2.38-2.61 (m, 2H), 4.05 (d, *J* = 4 Hz, 1H), 4.84-4.81 (dd, *J* = 4 Hz, 1H), 7.46 (t, *J* = 8 Hz, 1H), 7.60 (d, *J* = 8 Hz, 1H), 8.10 (d, *J* = 8 Hz, 1H), 8.15 (s, 1H); <sup>13</sup>C NMR(100 MHz, CDCl<sub>3</sub>) δ (ppm) 24.7, 27.6, 30.7, 42.7, 57.1, 74.1, 122.0, 122.9, 129.3, 133.2, 143.2, 148.3, 214.9.

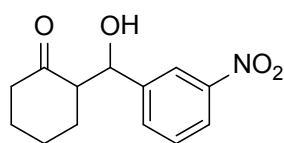

**6a**

**2-[Hydroxy-(2-nitro-phenyl)-methyl]-cyclohexanone (6b)**<sup>[1]</sup>: *syn*-diastereomer, <sup>1</sup>H NMR (400 MHz, CDCl<sub>3</sub>) δ (ppm) 1.48-1.88 (m, 5H), 2.07-2.14 (m, 1H), 2.38-2.48(m, 2H), 2.85-2.90 (m, 1H), 3.29 (br, 1H), 5.97 (s, 1H), 7.43 (t, *J* = 8 Hz, 1H), 7.65 (t, *J* = 8 Hz, 1H), 7.84 (d, *J* = 8 Hz, 1H), 8.0 (d, *J* = 8 Hz, 1H); <sup>13</sup>C NMR (100 MHz, CDCl<sub>3</sub>) δ (ppm) 24.8, 28.0, 42.5, 54.8, 66.6, 124.7, 127.9, 129.6, 133.2, 137.0, 147.1, 214.1; *anti*-diastereomer, <sup>1</sup>H NMR (400 MHz, CDCl<sub>3</sub>) δ (ppm) 1.59-2.49 (m, 8H), 2.68-2.81 (m, 1H), 4.2 (brs, 1H), 5.45 (d, *J* = 8 Hz, 1H), 7.43 (t, *J* = 8 Hz, 1H), 7.64 (t, *J* = 8.4 Hz, 1H), 7.77(d, *J* = 8 Hz, 1H), 7.85 (d, *J* = 8 Hz, 1H); <sup>13</sup>C NMR (100 MHz, CDCl<sub>3</sub>) δ (ppm) 25.0, 27.8, 31.1, 42.8, 57.3, 69.8, 124.1, 128.4, 129.0, 133.1, 136.6, 148.7, 215.0.

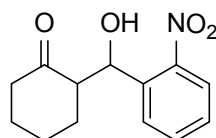

**6b**

**2-[Hydroxy-(4-nitro-phenyl)-methyl]-cyclohexanone (6c)** <sup>[1]</sup>: *syn*-diastereomer, <sup>1</sup>H NMR (400 MHz, CDCl<sub>3</sub>) δ (ppm) 1.57-1.77 (m, 4H), 1.81-1.90 (m, 1H), 2.08-2.16 (m, 1H), 2.34-2.45 (m, 1H), 2.59-2.67 (m, 1H), 3.18 (d, *J* = 4 Hz, 1H), 5.49 (s, 1H), 7.49 (d, *J* = 8 Hz, 2H), 8.21 (d, *J* = 8 Hz, 2H); <sup>13</sup>C NMR (100 MHz, CDCl<sub>3</sub>) δ (ppm) 24.8, 25.9, 27.9, 42.6, 56.8, 70.1, 123.5, 126.6, 147.0, 149.0, 214.1; *anti*-diastereomer, <sup>1</sup>H NMR (400 MHz, CDCl<sub>3</sub>) δ (ppm) 1.52-1.74 (m, 4H), 1.79-1.87 (m, 1H), 2.07-2.17 (m, 1H), 2.31-2.42 (m, 1H), 2.54-2.64 (m, 1H), 4.08 (d, *J* = 4 Hz, 1H), 4.90 (dd, *J* = 8 Hz, 1H), 7.51 (d, *J* = 8 Hz, 2H), 8.21 (d, *J* = 8 Hz, 2H); <sup>13</sup>C NMR (100 MHz, CDCl<sub>3</sub>) δ (ppm) 24.7, 27.6, 30.7, 42.7, 57.2, 74.0, 123.6, 127.9, 147.6, 148.33, 214.8.

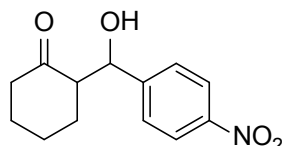

**6c**

**2-[Hydroxy-(2-nitro-phenyl)-methyl]-cyclopentanone (6d)** <sup>[2]</sup> (**mix**, *syn/anti* = 1:0.36 ): *anti*-diastereomer, <sup>1</sup>H NMR (400 MHz, CDCl<sub>3</sub>) δ (ppm) 1.68-1.74 (m, 2H), 1.94-2.15 (m, 4H), 2.36-2.50 (m, 1H), 2.65 (m, 1H), 5.85 (d, *J* = 4 Hz, 1H), 7.37 (t, *J* = 8 Hz, 1H), 7.69 (m, 1H), 7.83 (d, *J* = 8 Hz, 1H), 7.93 (d, *J* = 8 Hz, 1H); *syn*-diastereomer, 4.41 (brs, 0.36H), 5.37 (d, *J* = 8 Hz, 0.36H); <sup>13</sup>C NMR (100 MHz, CDCl<sub>3</sub>) δ (ppm) 20.2, 20.5, 23.0, 26.6, 38.6, 54.8, 55.5, 66.7, 69.1, 124.0, 124.6, 128.1, 128.6, 129.0, 133.2, 133.4, 136.3, 138.5, 147.0, 148.5, 218.8, 222.1.

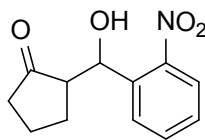

**6d**

**2-[Hydroxy-(3-nitro-phenyl)-methyl]-cyclopentanone (6e)** <sup>[3]</sup> (mix, *syn/anti* = 1:0.52 ):

*anti*-diastereomer, <sup>1</sup>H NMR (400 MHz, CDCl<sub>3</sub>) δ (ppm) 1.55-1.75 (m, 2H), 1.85-2.00 (m, 2H), 2.02-2.15 (m, 1H), 2.23-2.47 (m, 1H), 4.77 (d, *J* = 8 Hz, 0.41H), 7.52 (m, 2H), 8.02 (m, 2H); *anti*-diastereomer, 3.23 (s, 0.72H), 5.34 (s, 0.78H); <sup>13</sup>C NMR (100 MHz, CDCl<sub>3</sub>) δ (ppm) 20.3, 22.3, 26.8, 29.6, 38.6, 39.0, 55.0, 56.1, 70.1, 74.3, 120.5, 121.6, 122.2, 123.0, 129.3, 129.5, 131.7, 132.7, 143.6, 145.2, 148.3, 220.0, 222.5.

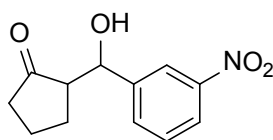

**6e**

**2-[Hydroxy-(4-nitro-phenyl)-methyl]-cyclopentanone (6f)** <sup>[3]</sup> (mix, *syn/anti* = 1:0.15 ):

*anti*-diastereomer, <sup>1</sup>H NMR (400 MHz, CDCl<sub>3</sub>) δ (ppm) 1.63-1.83 (m, 2H), 1.88-2.09 (m, 2H), 2.09-2.34 (m, 1H), 2.34-2.55 (m, 2H), 4.78 (s, 0.13H), 4.85 (d, *J* = 8 Hz, 0.15H), 7.54 (d, *J* = 8 Hz, 2H), 8.22 (d, *J* = 8 Hz, 2H); *syn*-diastereomer, 2.79 (s, 0.75H), 5.43 (s, 0.87H); <sup>13</sup>C NMR (100 MHz, CDCl<sub>3</sub>) δ (ppm) 20.3, 22.3, 26.8, 38.6, 39.0, 55.1, 56.1, 70.4, 74.4, 123.6, 123.7, 126.4, 127.4, 147.1, 148.6, 150.4, 219.8, 222.3.

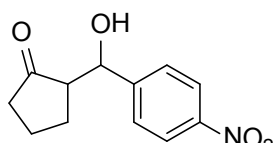

**6f**

**2-[Hydroxy-(3-nitro-phenyl)-methyl]-cycloheptanone (6g)** <sup>[3]</sup>: *syn*-diastereomer, <sup>1</sup>H NMR

(400 MHz, CDCl<sub>3</sub>) δ (ppm) 1.24-1.32 (m, 2H), 1.41-1.54 (m, 1H), 1.59-1.74 (m, 2H),

1.77-1.95 (m, 3H), 2.42-2.55(m, 1H), 2.58-2.69 (m, 1H), 2.83-2.92 (m, 1H), 3.27 (br, 1H), 5.30 (s, 1H), 7.53( t,  $J = 8$  Hz, 1H), 7.70 (d,  $J = 8$  Hz, 1H), 8.12(d,  $J = 8$  Hz, 1H), 8.22 (s, 1H);  $^{13}\text{C}$  NMR (100 MHz,  $\text{CDCl}_3$ )  $\delta$  (ppm) 23.5, 23.9, 28.9, 29.1, 43.9, 57.1, 72.2, 121.0, 122.2, 129.2, 132.1, 144.3, 148.3, 217.6; *anti*-diastereomer,  $^1\text{H}$  NMR (400 MHz,  $\text{CDCl}_3$ )  $\delta$  (ppm) 1.27-1.39 (m, 2H), 1.47-1.57 (m, 1H), 1.59-1.75 (m, 2H), 1.76-1.82 (m, 2H), 2.18-2.59(m, 2H), 2.80-3.01 (m, 1H), 3.63 (brs, 1H), 4.85 (d,  $J = 8$  Hz, 1H), 7.63 (d,  $J = 8$  Hz, 1H), 8.08 (d,  $J = 8$  Hz, 1H), 8.16 (t, 1H);  $^{13}\text{C}$  NMR (100 MHz,  $\text{CDCl}_3$ )  $\delta$  (ppm) 23.5, 28.2, 28.6, 44.1, 57.9, 74.7, 121.9, 122.8, 129.4, 133.1, 144.1, 148.3, 217.0.

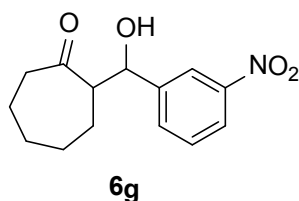

**2-[Hydroxy-(3-chloro-phenyl)-methyl]-cyclohexanone (6h)** <sup>[2]</sup>: *syn*-diastereomer,  $^1\text{H}$  NMR (400 MHz,  $\text{CDCl}_3$ )  $\delta$  (ppm) 1.48-1.75 (m, 5H), 1.81-1.90 (m, 1H), 2.04-2.14 (m, 1H), 2.30-2.50 (m, 1H), 2.52-2.62 (m, 1H), 3.09 (d,  $J = 4$  Hz, 1H), 5.36 (s, 1H), 7.13-7.35 (m, 4H);  $^{13}\text{C}$  NMR (100 MHz,  $\text{CDCl}_3$ )  $\delta$  (ppm) 24.8, 25.9, 27.9, 42.6, 57.0, 70.1, 123.8, 126.0, 127.1, 129.4, 134.2, 143.6, 214.5; *anti*-diastereomer,  $^1\text{H}$  NMR (400 MHz,  $\text{CDCl}_3$ )  $\delta$  (ppm) 1.23-1.73 (m, 5H), 1.74-1.85 (m, 1H), 2.05-2.15 (m, 1H), 2.30-2.40 (m, 1H), 2.44-2.52 (m, 1H), 2.53-2.62 (m, 1H), 3.99 (s, 1H), 4.68 (d,  $J = 8$  Hz, 1H), 7.14-7.30 (m, 4H);  $^{13}\text{C}$  NMR (100 MHz,  $\text{CDCl}_3$ )  $\delta$  (ppm) 24.7, 27.7, 30.8, 42.7, 57.3, 74.3, 125.3, 127.1, 128.0, 129.6, 134.3, 143.1, 215.2.

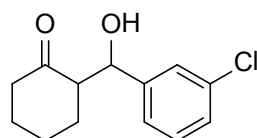

**6h**

**2-[Hydroxy-(4-chloro-phenyl)-methyl]-cyclohexanone (6i)** <sup>[2]</sup> (**mix, *syn/anti* = 1:1.27**):

*anti*-diastereomer, <sup>1</sup>H NMR (400 MHz, CDCl<sub>3</sub>) δ (ppm) 1.46-1.62 (m, 2H), 1.62-1.74 (m, 2H), 1.75-1.89 (m, 1H), 2.03-2.14(m, 1H), 2.30-2.42 (m, 1H), 2.51-2.61 (m, 1H), 4.0(d, *J* = 4 Hz, 0.54H), 4.77 (dd, *J* = 4 Hz, 0.56H), 7.23-7.33 (m, 4H); *syn*-diastereomer, 3.08 (d, *J* = 4 Hz, 0.4H), 5.35 (s, 0.44H); <sup>13</sup>C NMR (100 MHz, CDCl<sub>3</sub>) δ (ppm) 24.7, 24.8, 25.9, 27.7, 27.9, 30.7, 42.6, 57.0, 57.3, 70.1, 74.1, 127.2, 128.3, 128.5, 132.7, 133.5, 139.5, 139.9, 214.6, 215.3.

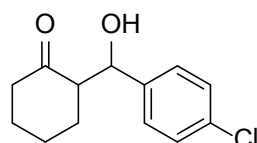

**6i**

**2-[Hydroxy-(3-bromo-phenyl)-methyl]-cyclohexanone (6j)** <sup>[2]</sup>: *syn*-diastereomer, <sup>1</sup>H NMR

(400 MHz, CDCl<sub>3</sub>) δ (ppm) 1.51-1.75 (m, 4H), 1.80-1.90 (m, 1H), 2.04-2.14 (m, 1H), 2.32-2.49 (m, 1H), 2.52-2.64 (m, 1H), 3.10 (d, *J* = 4 Hz, 1H), 5.35 (s, 1H), 7.21 (m, 2H), 7.37 (m, 1H), 7.48 (s, 1H); <sup>13</sup>C NMR (100 MHz, CDCl<sub>3</sub>) δ (ppm) 24.8, 25.9, 27.9, 42.6, 57.0, 70.0, 122.5, 124.4, 129.0, 129.8, 130.1, 143.9, 214.5; *anti*-diastereomer, <sup>1</sup>H NMR (400 MHz, CDCl<sub>3</sub>) δ (ppm) 1.24-1.36 (m, 1H), 1.52- 1.74 (m, 3H), 1.76-1.84 (m, 1H), 2.01-2.13 (m, 1H), 2.29-2.40 (m, 1H), 2.42-2.51 (m, 1H), 2.52-2.62 (m, 1H), 4.02 (s, 1H), 4.74 (d, *J* = 8 Hz, 1H), 7.22 (m, 2H), 7.42 (m, 1H), 7.49 (m, 1H); <sup>13</sup>C NMR (100 MHz, CDCl<sub>3</sub>) δ (ppm) 24.8, 27.7, 30.8, 42.7, 57.3, 74.2, 122.6, 125.8, 129.9, 130.0, 143.3, 215.2.

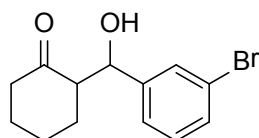

**6j**

**2-[Hydroxy-(4-bromo-phenyl)-methyl]-cyclohexanone (6k)** <sup>[2]</sup> (mix, *syn/anti* = 1.26 :1 ):

*anti*-diastereomer, <sup>1</sup>H NMR (400 MHz, CDCl<sub>3</sub>) δ (ppm) 1.47-1.73 (m, 4H), 1.75-1.88 (m, 1H), 2.04-1.13 (m, 1H), 2.30-2.41 (m, 1H), 2.42-2.50 (m, 1H), 2.51-2.90 (m, 1H), 3.99 (s, 0.41H), 4.75 (dd, *J* = 8 Hz, 0.42H), 7.19 (m, 2H), 7.46 (m, 2H); *syn*-diastereomer, 3.08 (s, 0.53H), 5.33 (s, 0.56H); <sup>13</sup>C NMR(100 MHz, CDCl<sub>3</sub>) δ (ppm) 24.7, 24.8, 25.9, 27.7, 27.9, 30.7, 42.6, 57.0, 57.3, 70.1, 74.2, 120.8, 121.7, 127.5, 128.7, 131.2, 131.5, 140.0, 140.5, 214.6, 215.3.

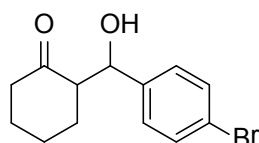

**6k**

**2-[Hydroxy-(4-flouro-phenyl)-methyl]-cyclohexanone (6l)** <sup>[4]</sup> (mix, *syn/anti* = 1.41 :1 ):

*anti*-diastereomer, <sup>1</sup>H NMR (400 MHz, CDCl<sub>3</sub>) δ (ppm) 1.52-1.89 (m, 5H), 2.04-2.14 (m, 1H), 2.29-2.49 (m, 2H), 2.52-2.62 (m, 1H), 4.0 (d, *J* = 4 Hz, 0.42H), 4.77 (d, *J* = 8 Hz, 0.41H), 7.02 (m, 2H), 7.29 (m, 2H); *syn*-diastereomer, 3.06 (d, *J* = 4 Hz, 0.53H), 5.36 (s, 0.59H); <sup>13</sup>C NMR(100 MHz, CDCl<sub>3</sub>) δ (ppm) 24.7, 24.8, 26.0, 27.7, 28.0, 30.8, 42.7, 57.2, 57.5, 70.2, 74.1, 115.1, 115.3, 127.4, 128.6, 136.7, 137.1, 160.7, 163.1, 214.8, 215.1.



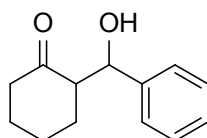

**6l**

**2-[Hydroxy-(4-chloro-3-nitro-phenyl)-methyl]-cyclohexanone (6m)** <sup>[5]</sup> (mix, *syn/anti* = **1.1:1**): *anti*-diastereomer, <sup>1</sup>H NMR (400 MHz, CDCl<sub>3</sub>) δ (ppm) 1.48-1.78 (m, 4H), 1.81-1.92 (m, 1H), 2.07-2.17 (m, 1H), 2.31-2.44 (m, 1H), 2.44-2.52 (m, 1H), 2.53-2.66 (m, 1H), 4.10 (d, *J* = 4 Hz, 0.45H), 4.85 (dd, *J* = 4Hz, 0.46H); *syn*-diastereomer, 3.23 (s, 0.48H), 5.41 (s, 0.51H); <sup>13</sup>C NMR(100 MHz, CDCl<sub>3</sub>) δ (ppm) 24.6, 24.7, 25.9, 27.5, 27.8, 30.6, 40.5, 40.6, 56.5, 57.0, 69.4, 73.4, 123.0, 124.0, 125.3, 126.1, 130.5, 131.5, 131.6, 131.7, 141.8, 142.4, 147.8, 213.9, 214.6.

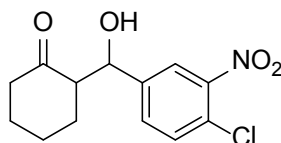

**6m**

**2-[Hydroxy-(3-methoxy-phenyl)-methyl]-cyclohexanone (6n)** <sup>[6]</sup>: *syn*-diastereomer, <sup>1</sup>H NMR (400 MHz, CDCl<sub>3</sub>) δ (ppm) 1.61-1.92 (m, 4H), 2.00-2.19 (m, 1H), 2.28- 2.51 (m, 1H), 2.53-2.71 (m, 1H), 3.01 (s, 1H), 3.81 (s, 3H), 5.37 (s, 1H), 6.83 (m, 3H), 7.25 (m, 1H); <sup>13</sup>C NMR(100 MHz, CDCl<sub>3</sub>) δ (ppm) 24.9, 26.0, 27.9, 42.7, 55.2, 57.2, 70.1, 111.5, 112.4, 118.0, 129.2, 143.2, 159.6, 214.8; *anti*-diastereomer, <sup>1</sup>H NMR (400 MHz, CDCl<sub>3</sub>) δ (ppm) 1.49-1.72 (m, 4H), 1.74- 1.84 (m, 1H), 2.03-2.13 (m, 1H), 2.31-2.40 (m, 1H), 2.44-2.51 (m, 1H), 2.55-2.65 (m, 1H), 3.81 (s, 3H), 3.93 (s, 3H), 4.76 (d, *J* = 8 Hz, 1H), 6.86 (m, 3H), 7.26 (m, 1H); <sup>13</sup>C NMR(100 MHz, CDCl<sub>3</sub>) δ (ppm) 24.7, 27.8, 30.9, 42.7, 55.2, 57.4, 74.7, 112.4, 113.4, 119.5, 129.3, 142.5, 159.7, 215.5.

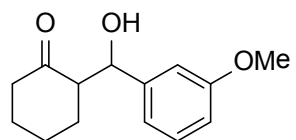

**6n**

### NMR spectra for aldol products 3a-n

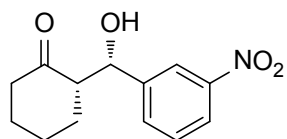

**syn-6a**

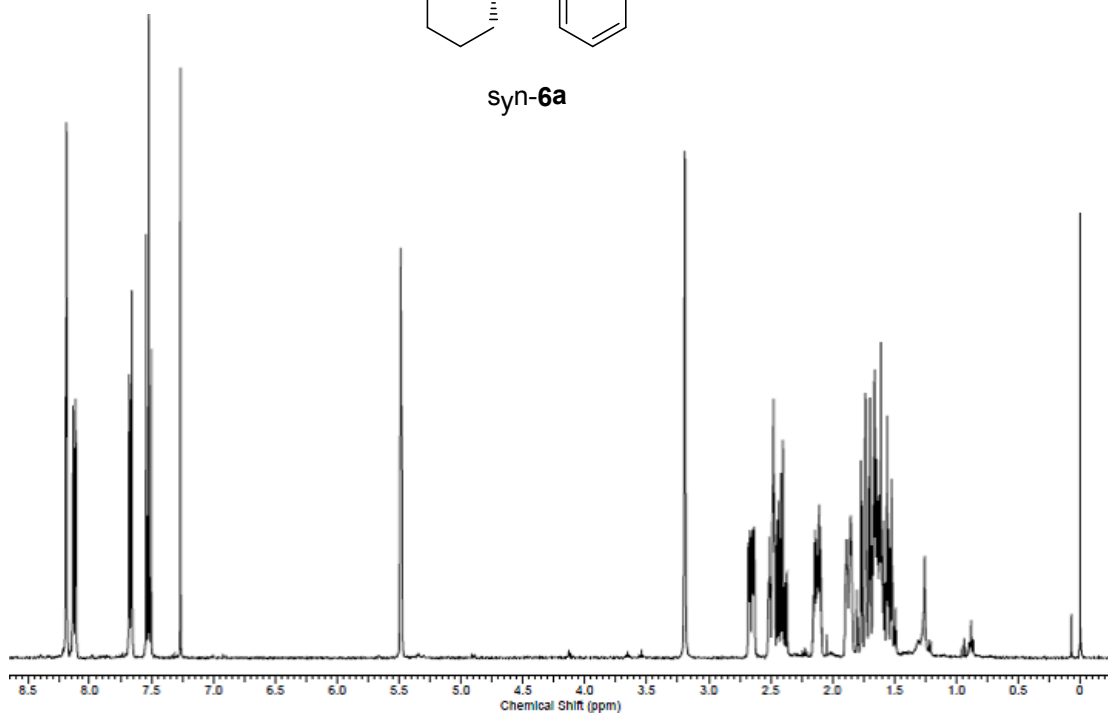

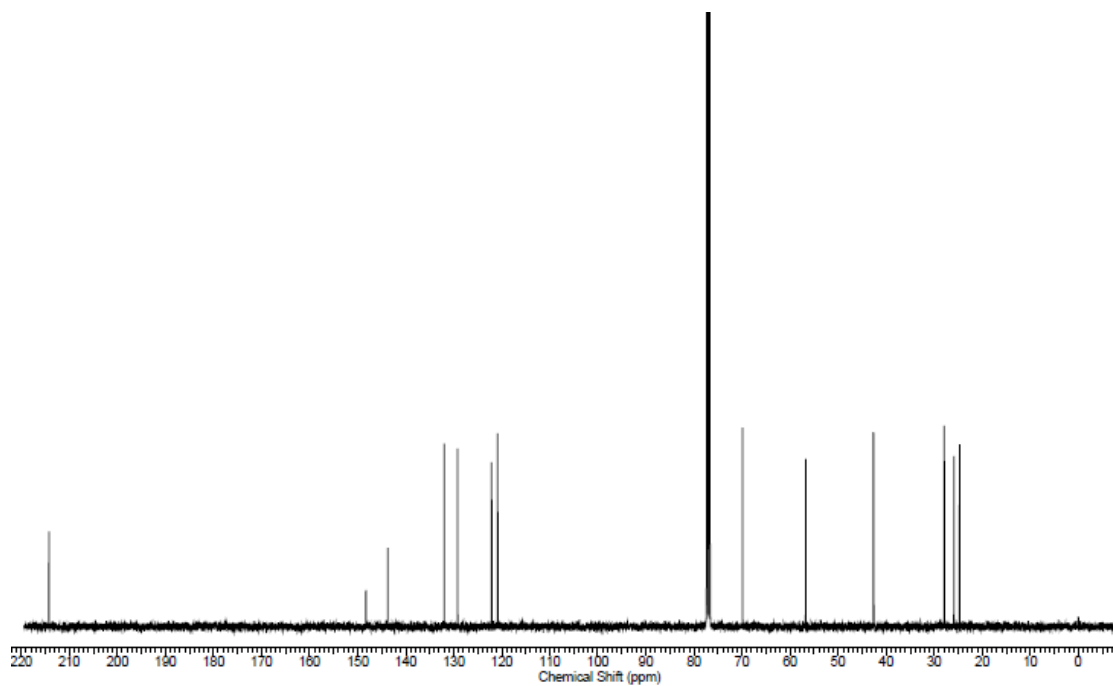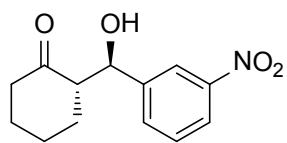

anti-6a

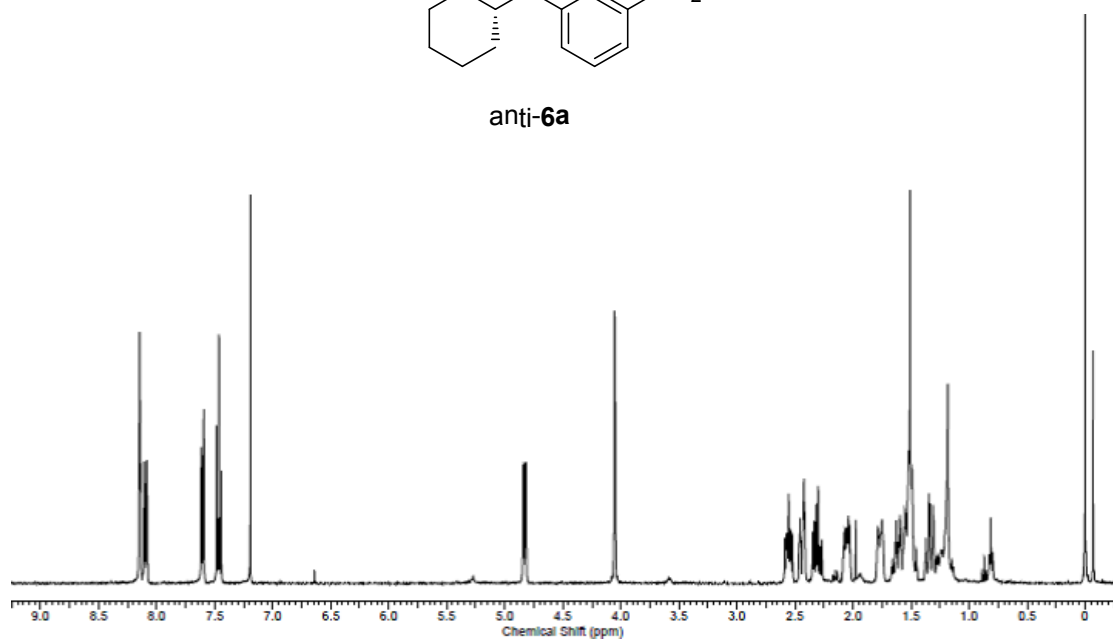

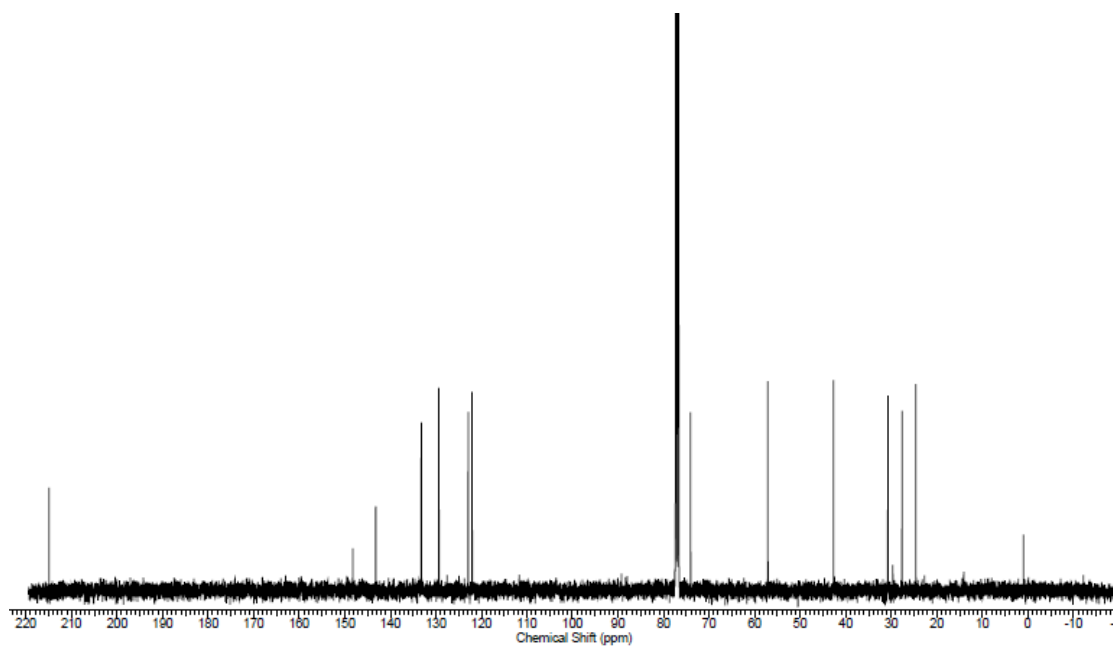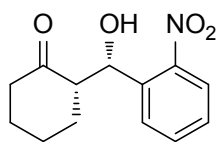

**syn-6b**

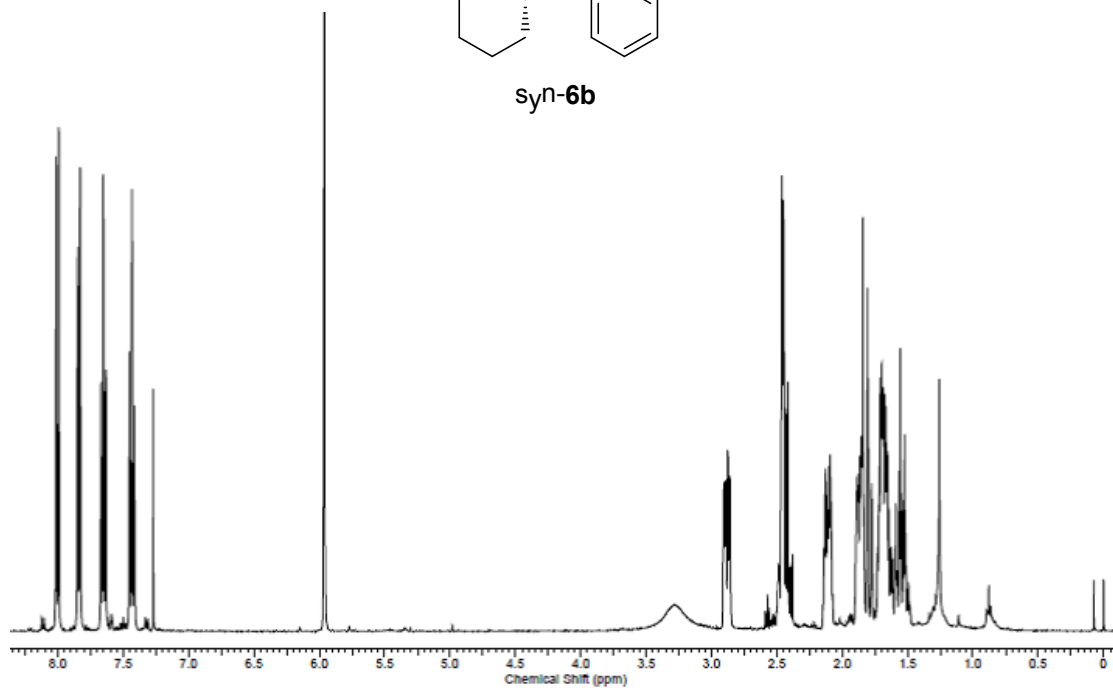

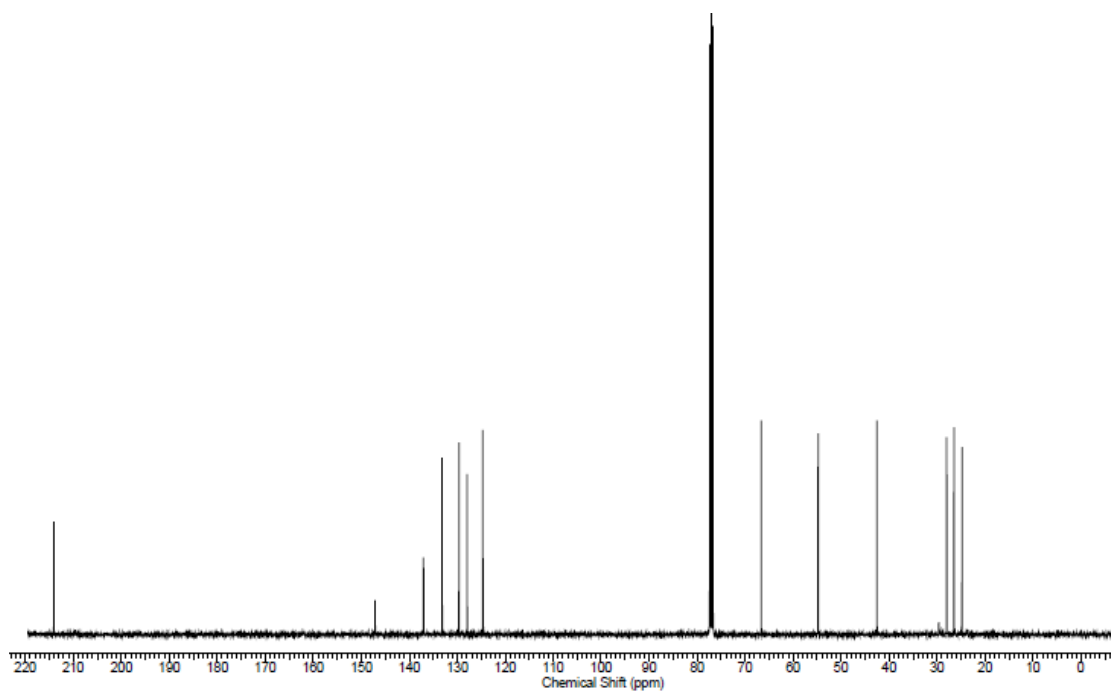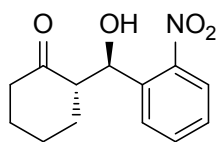

**anti-6b**

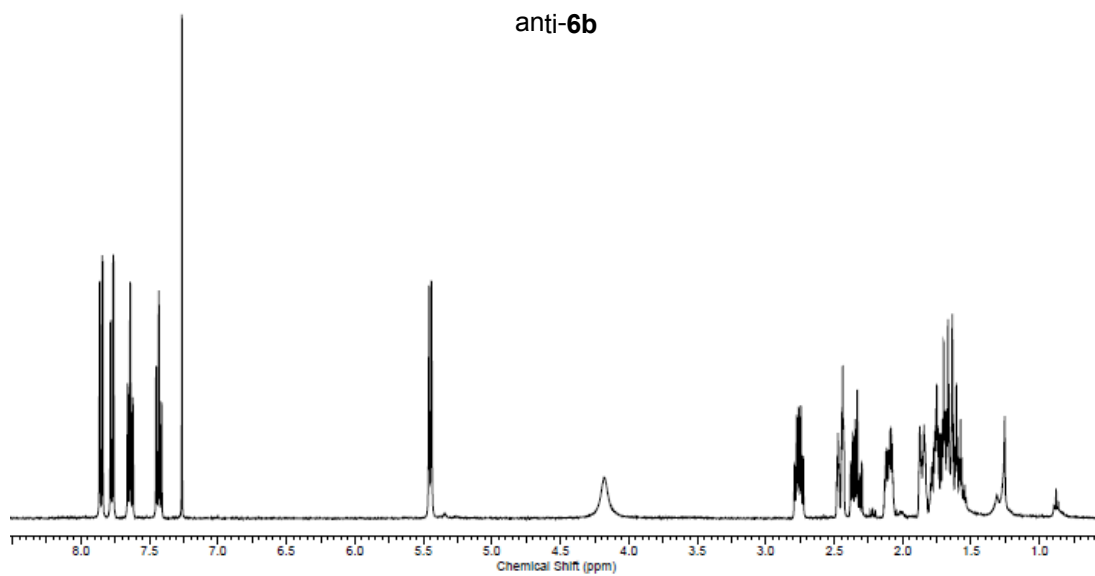

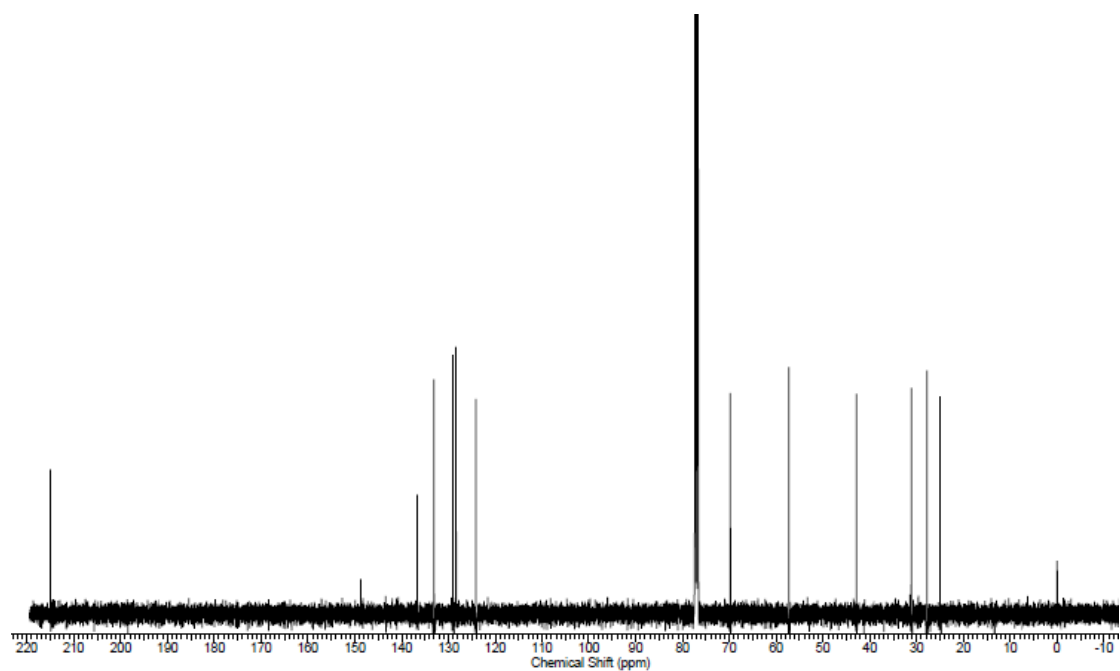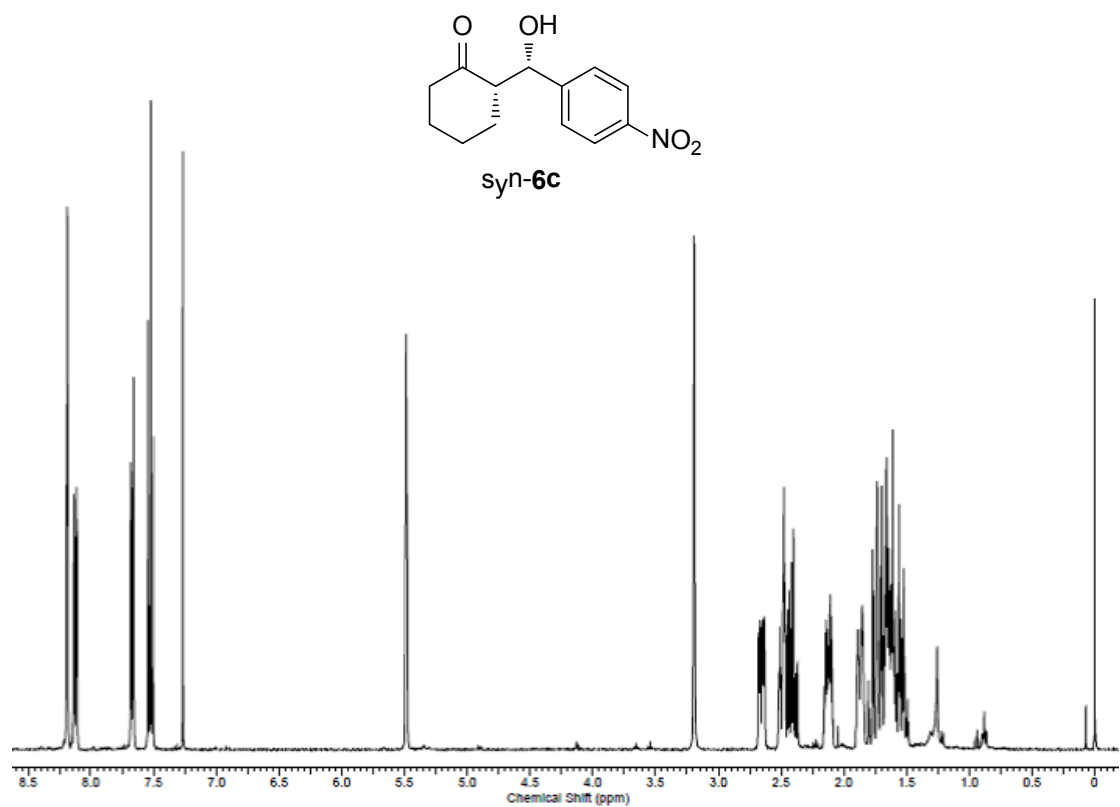

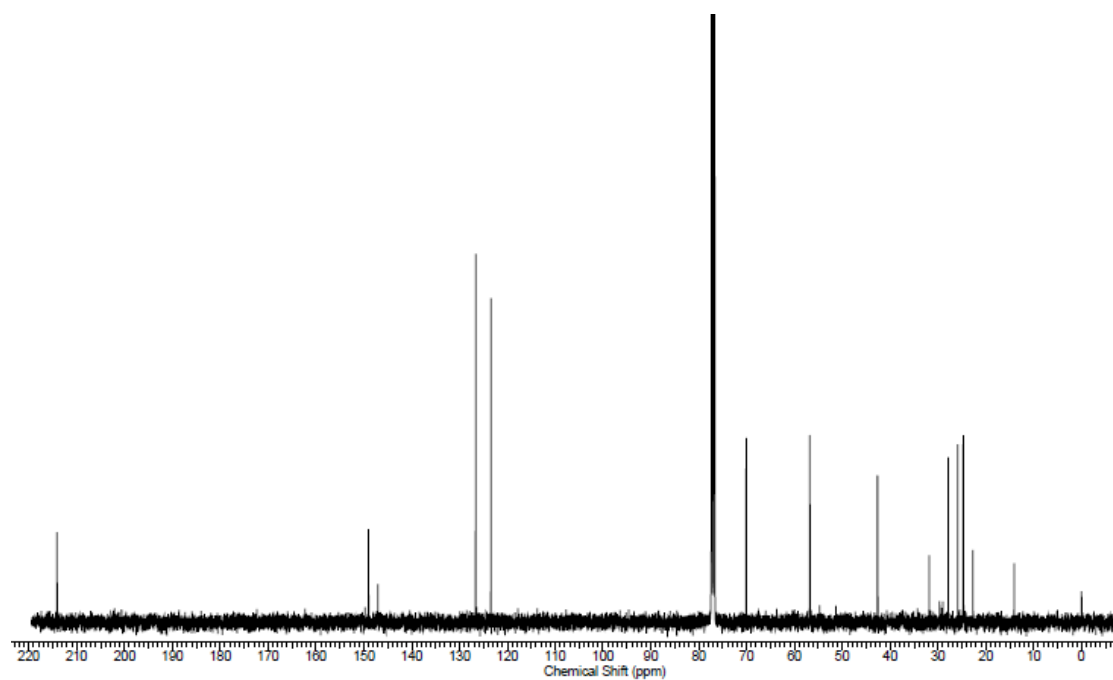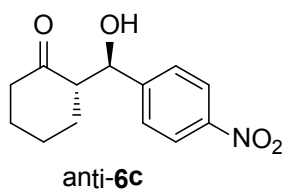

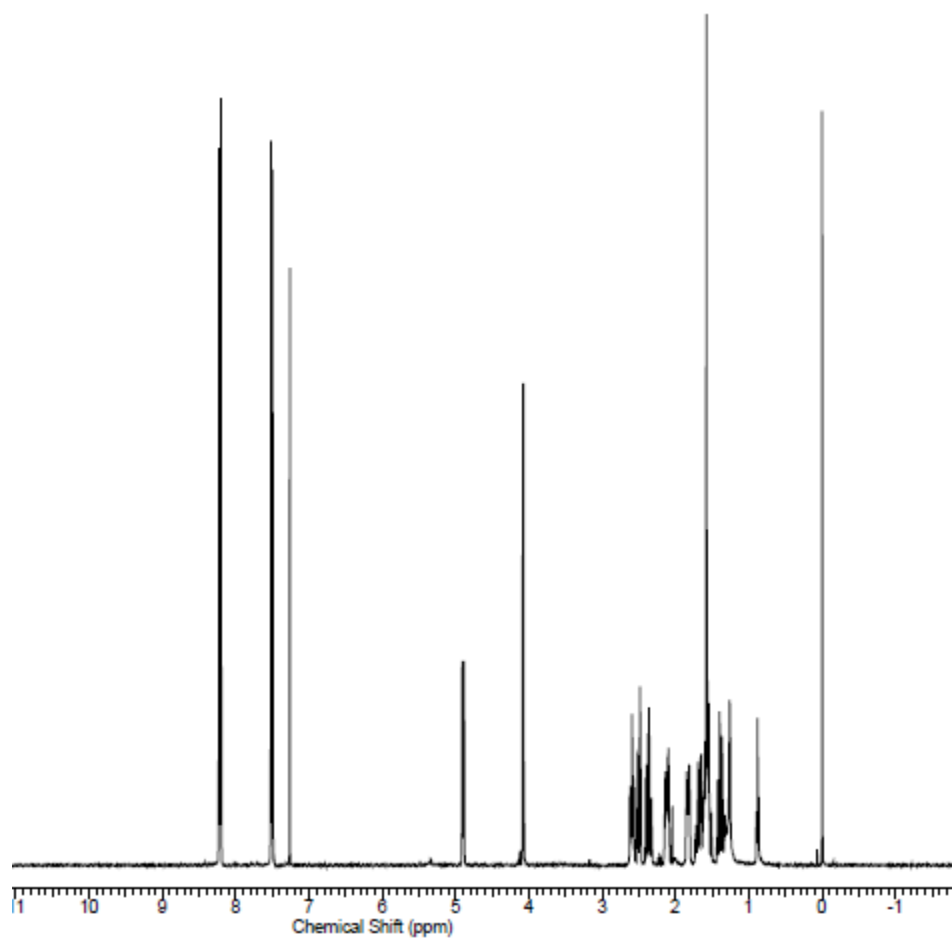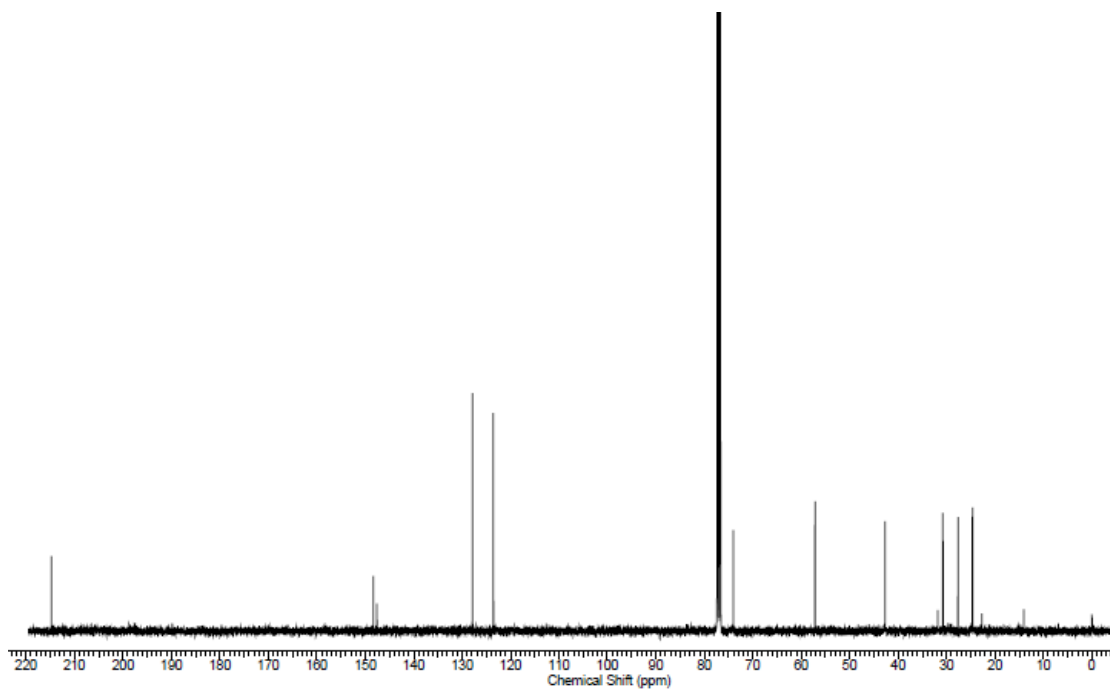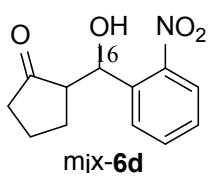



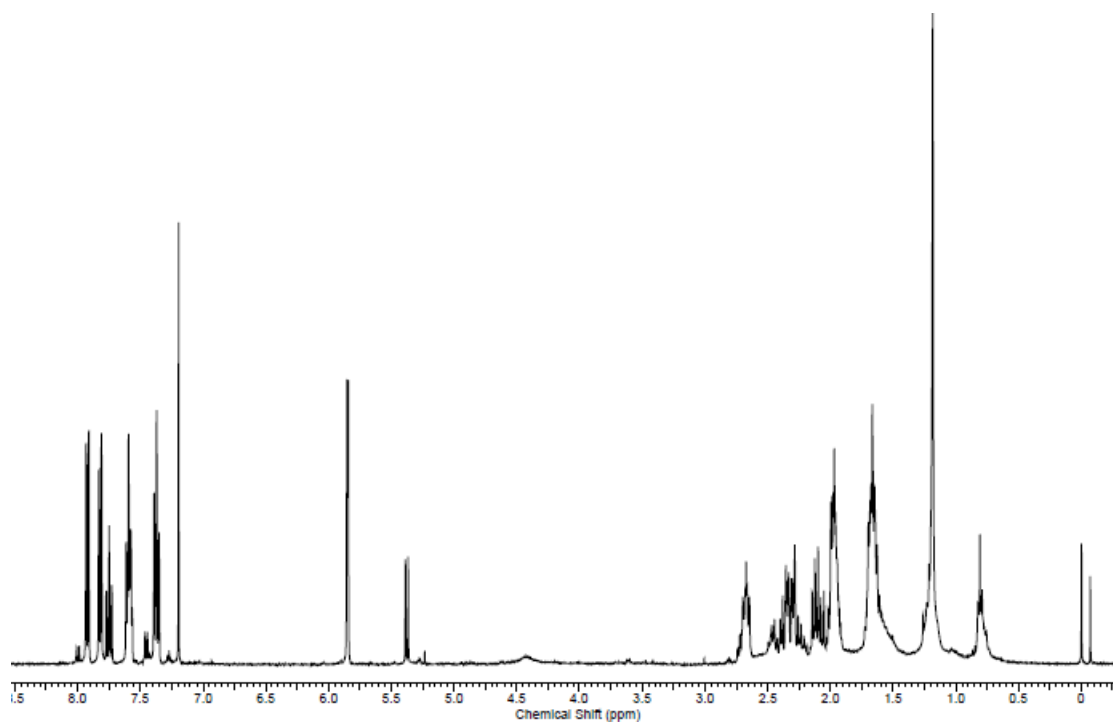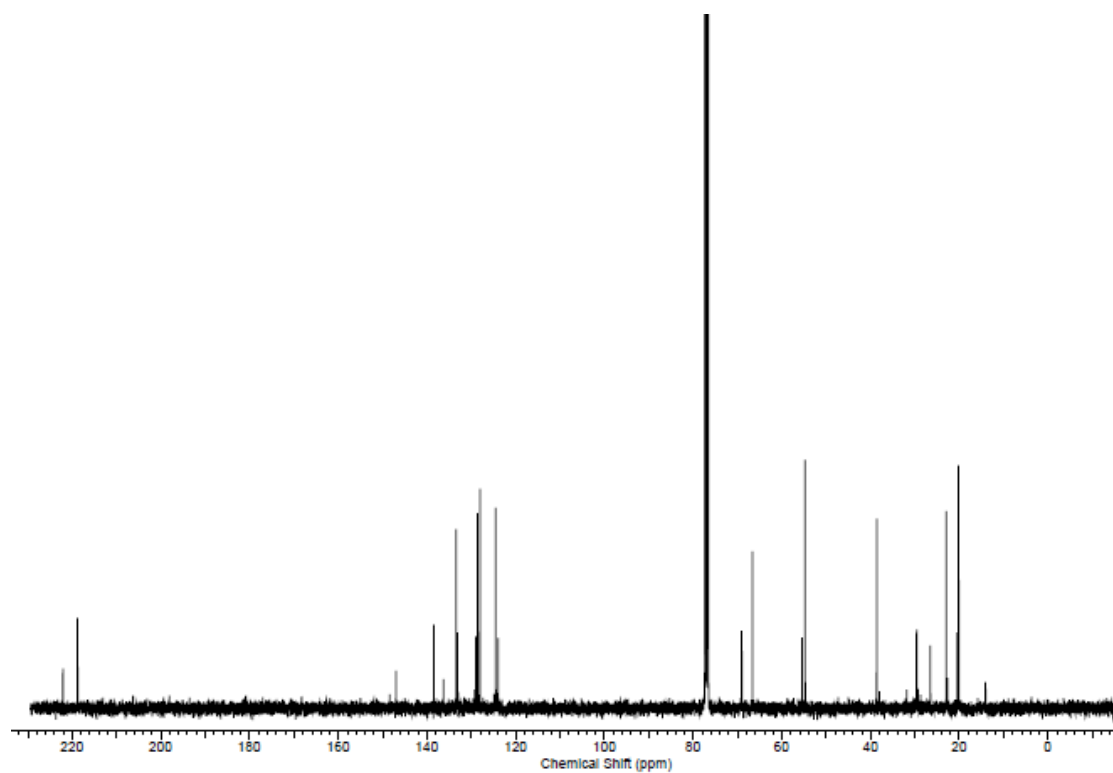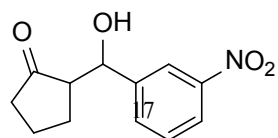

m1x-6e

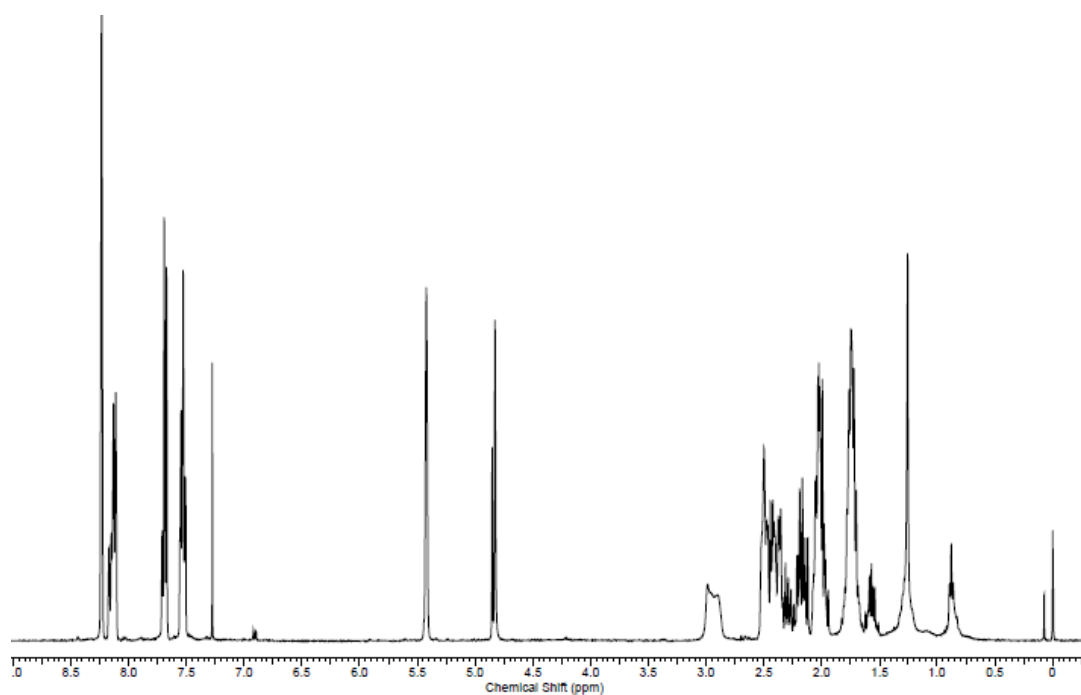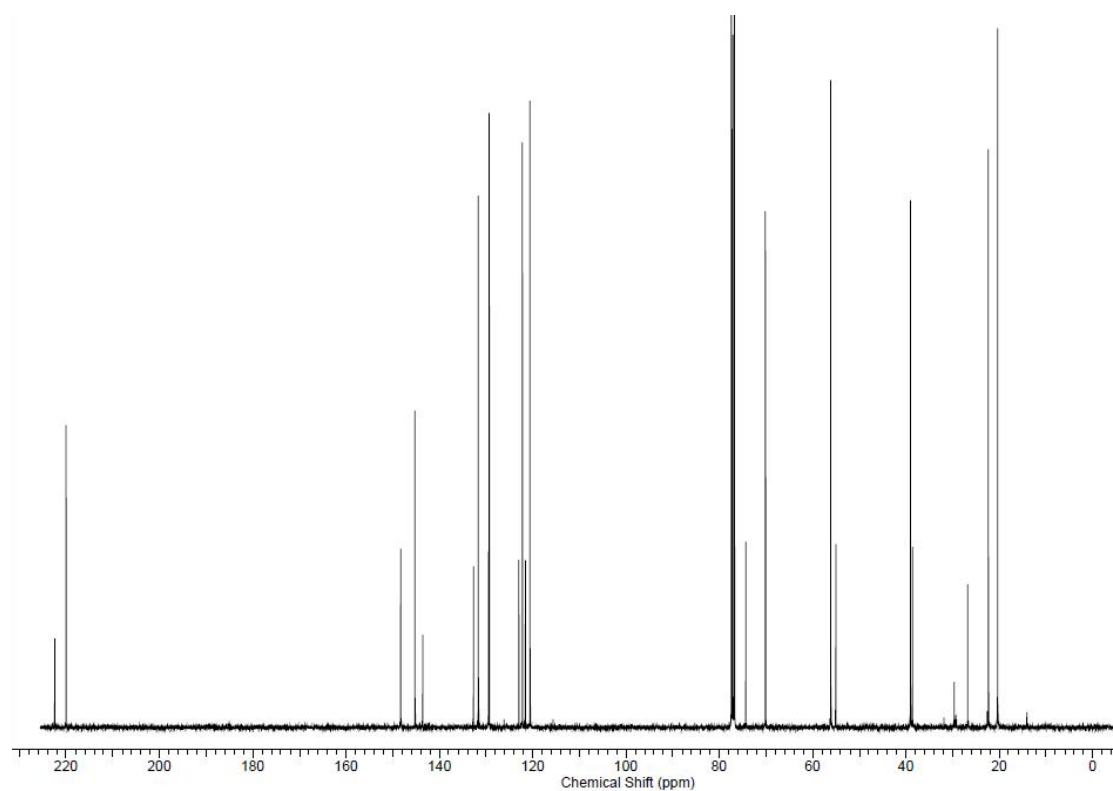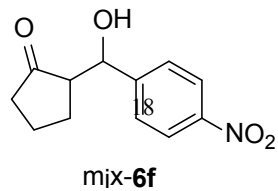

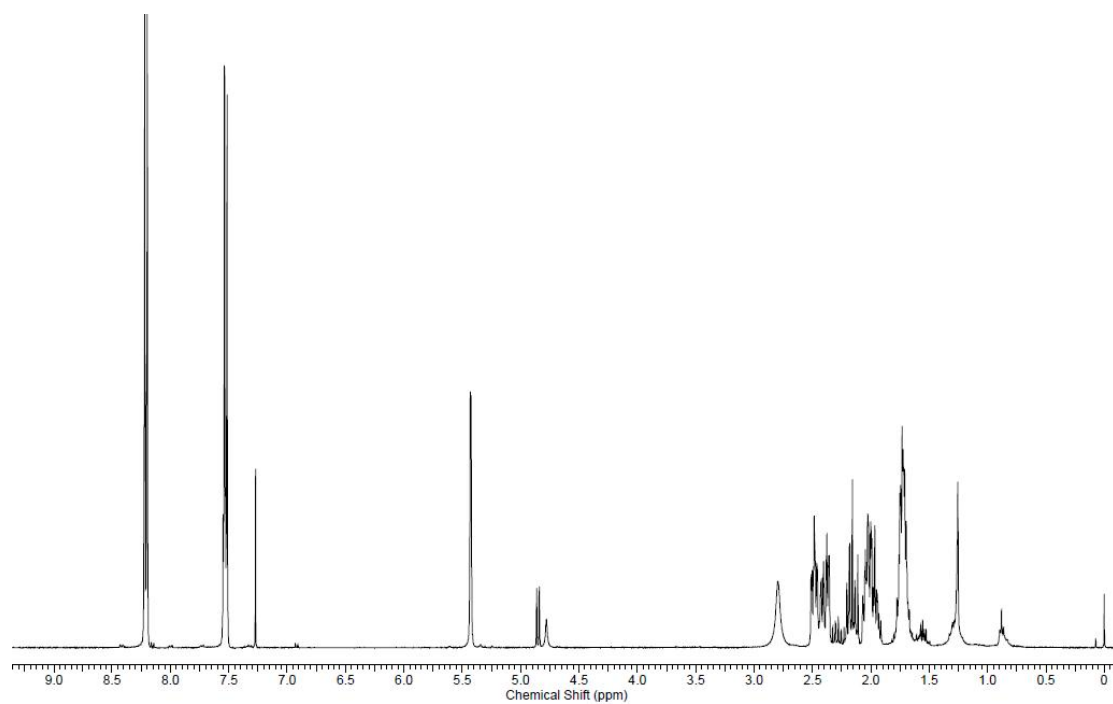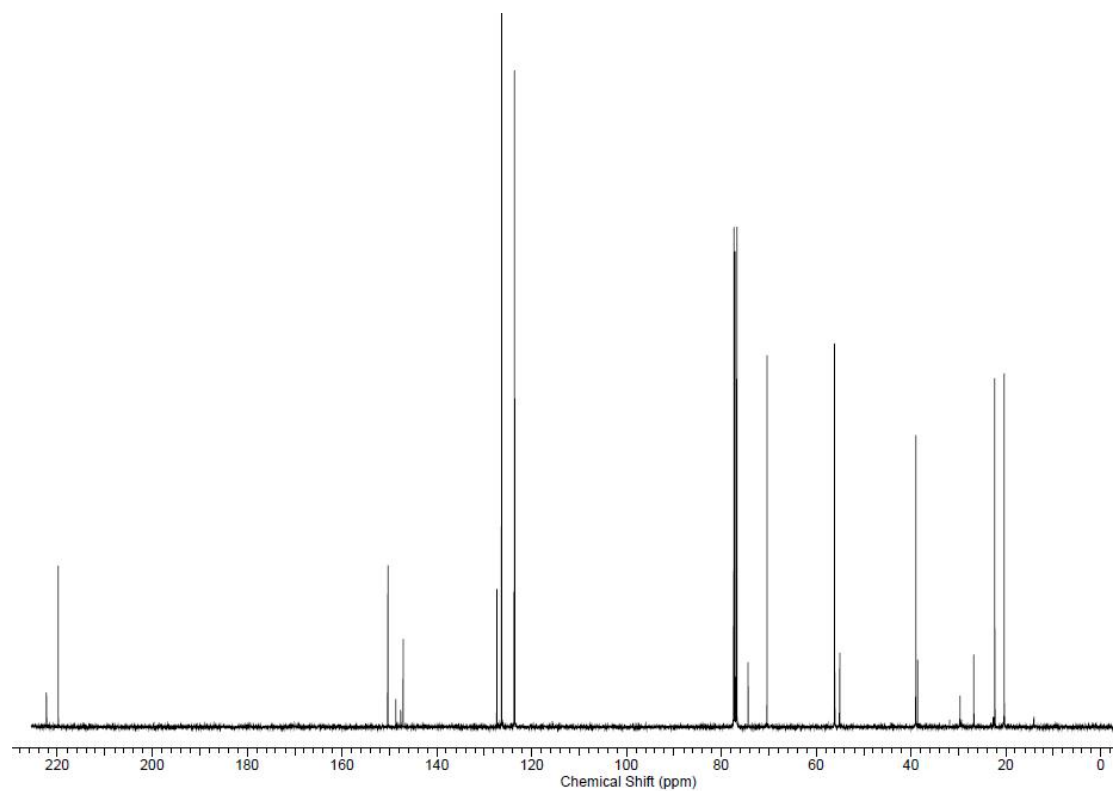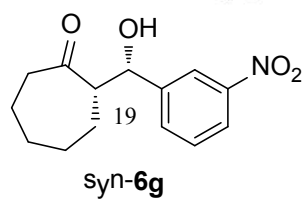

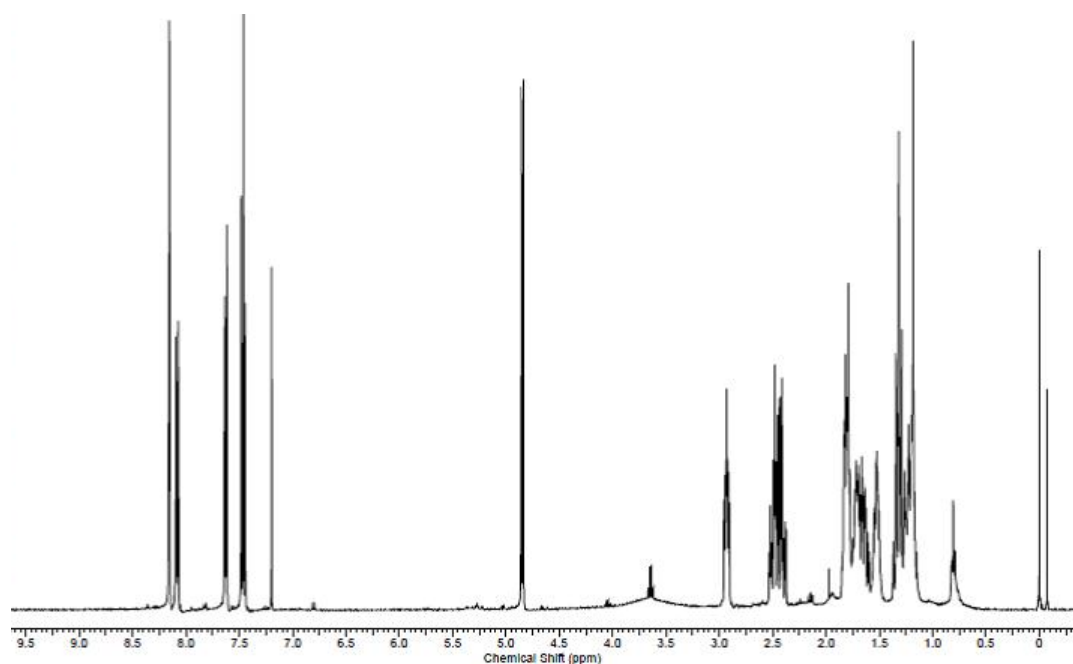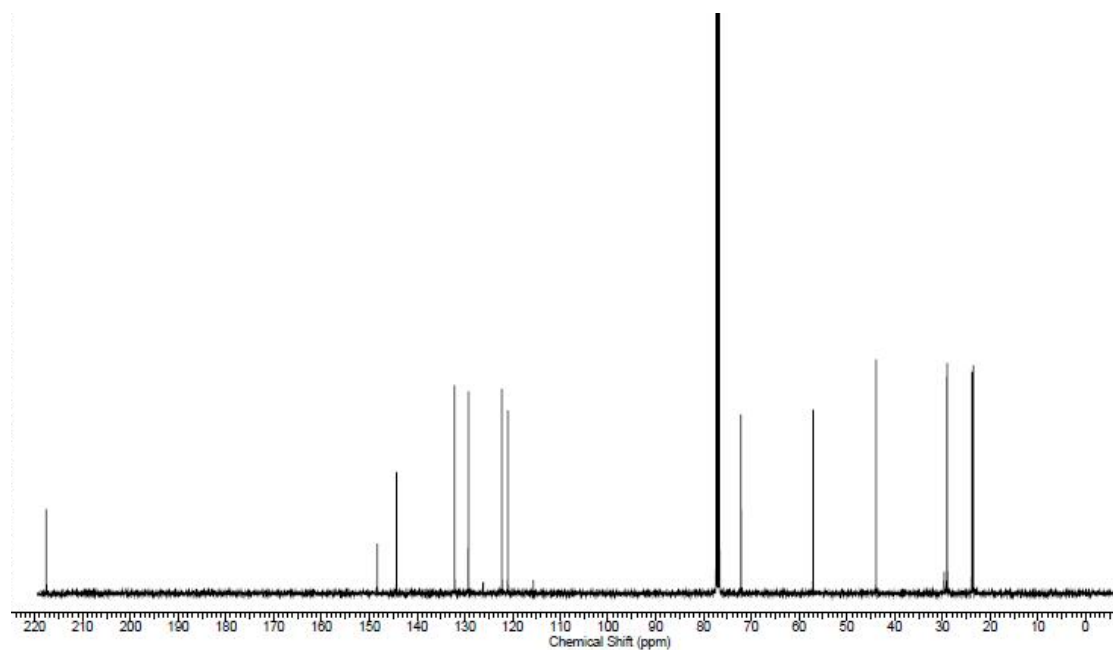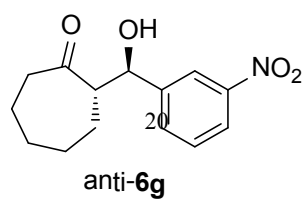

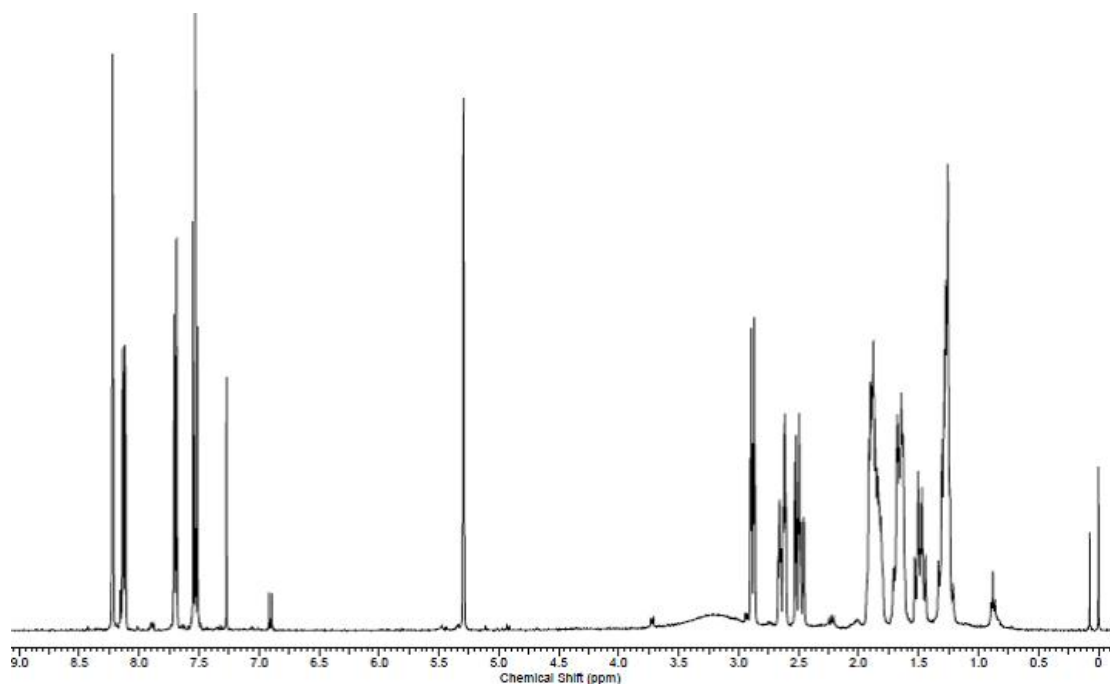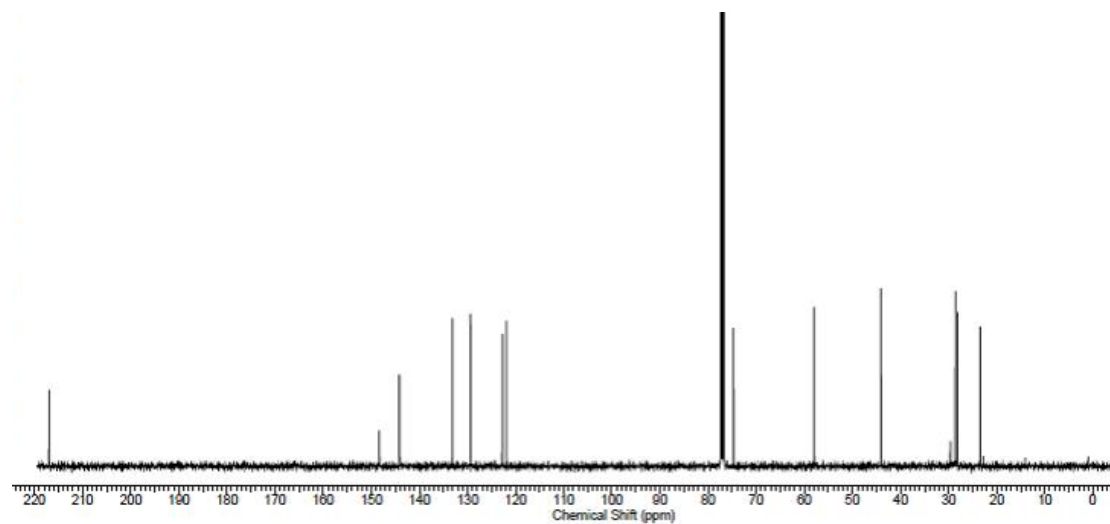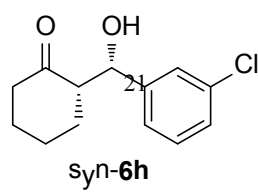

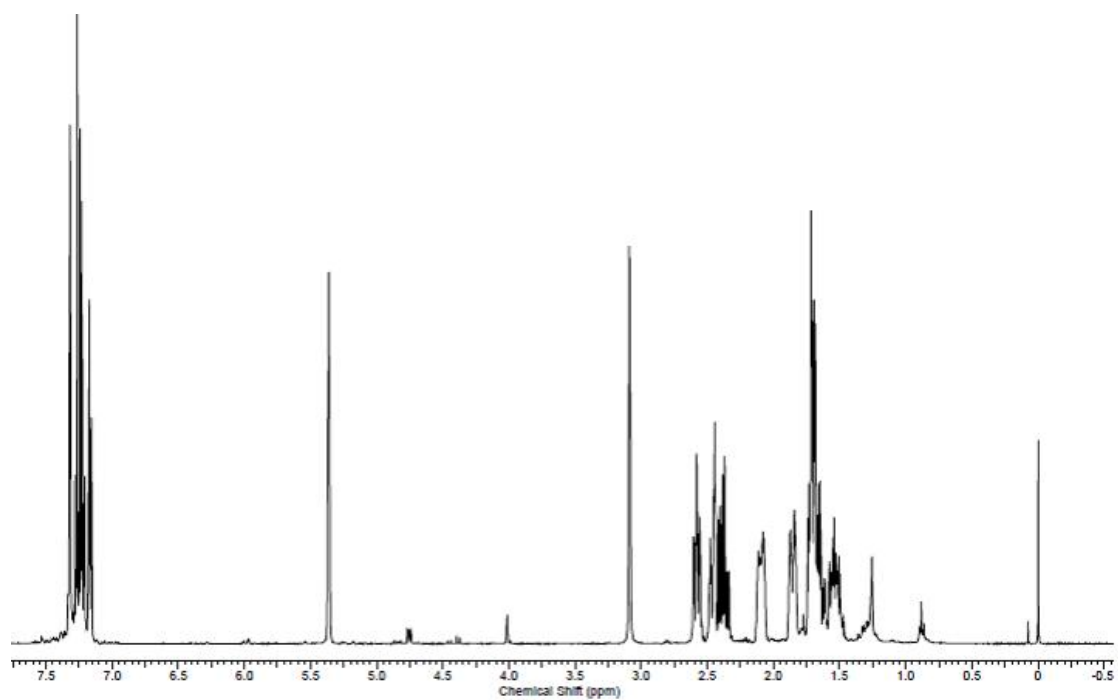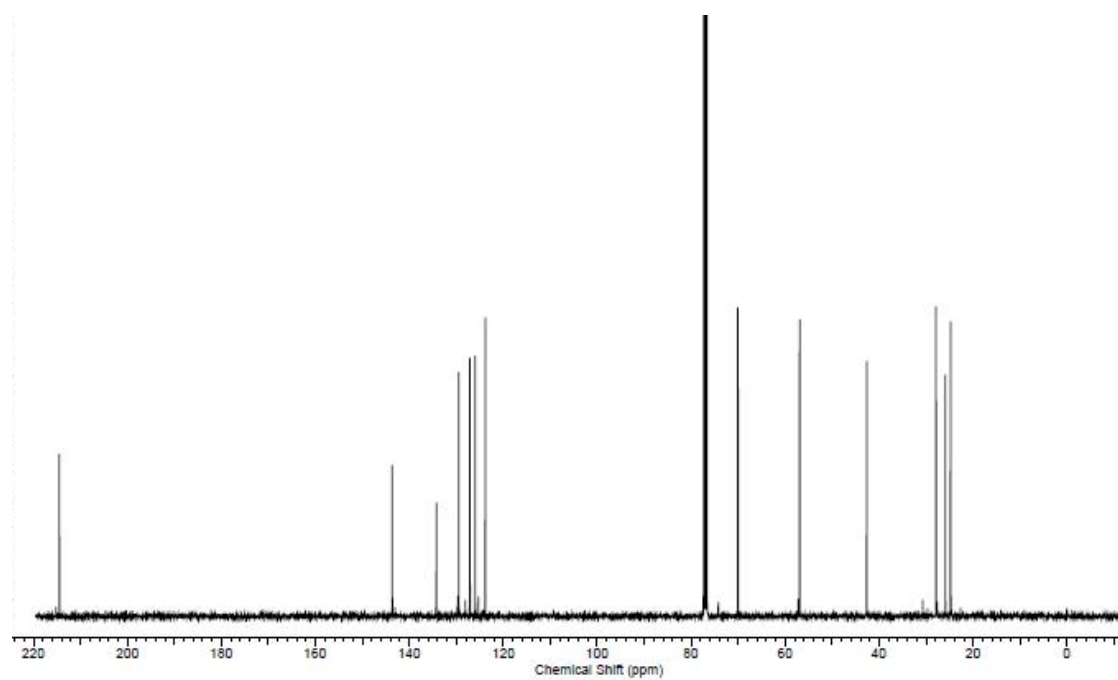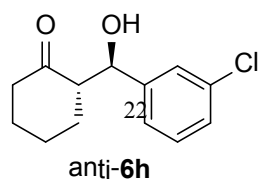

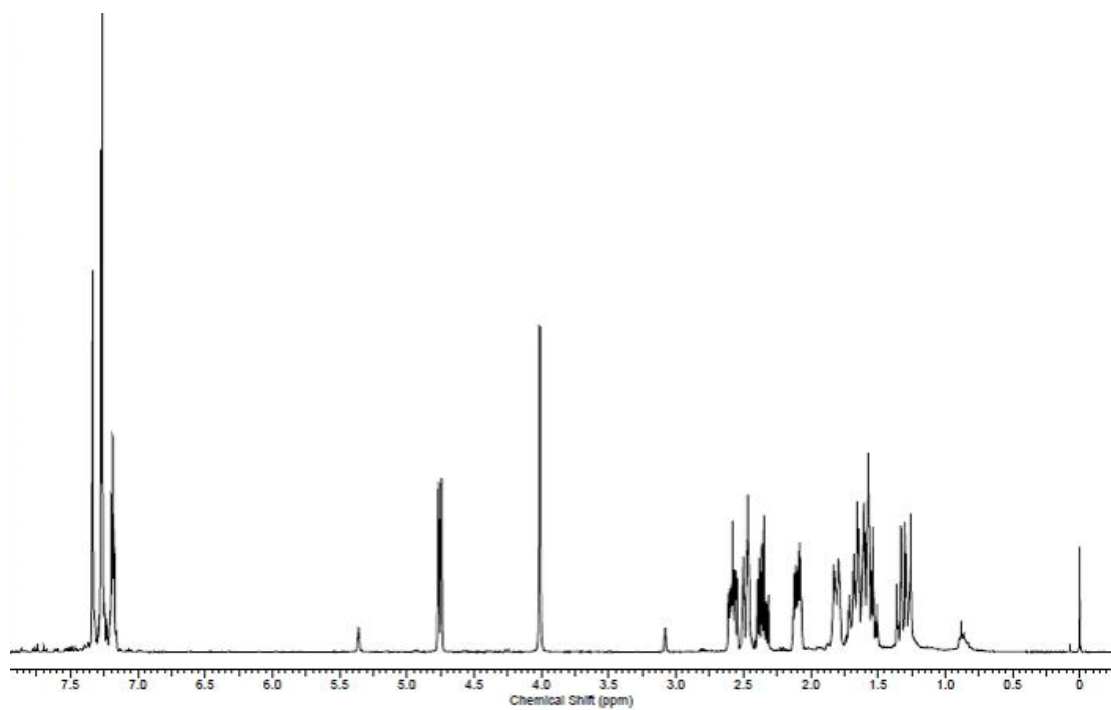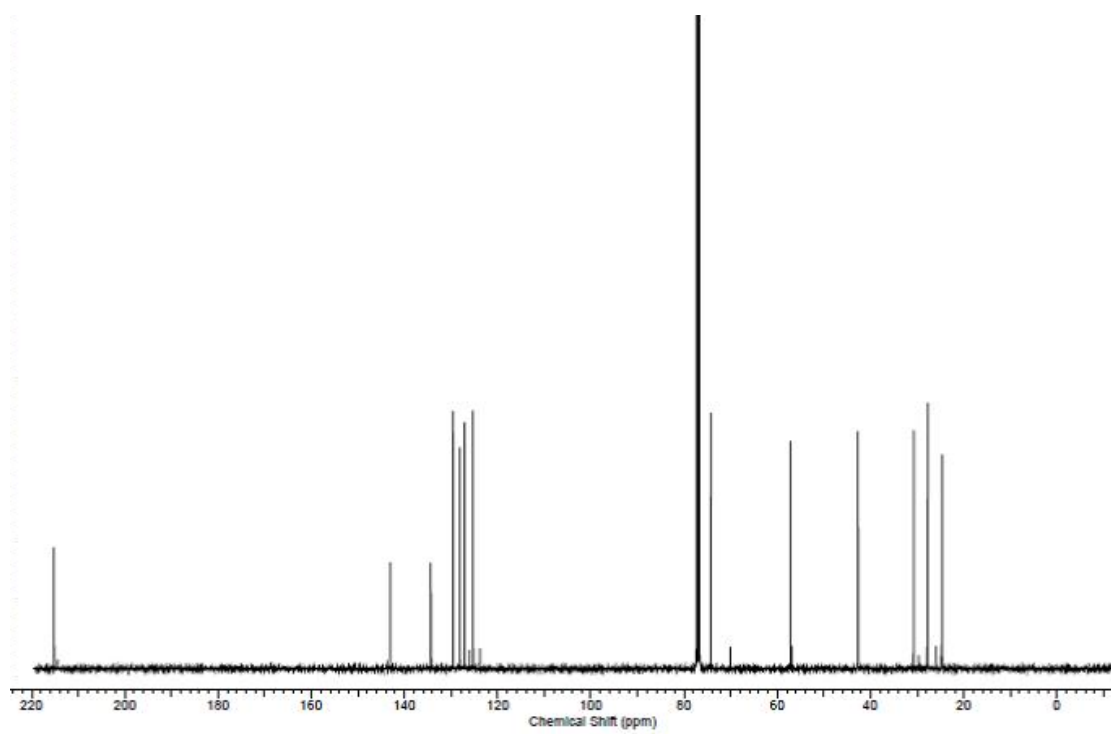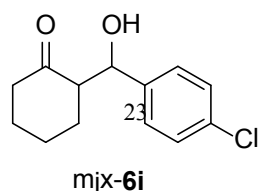

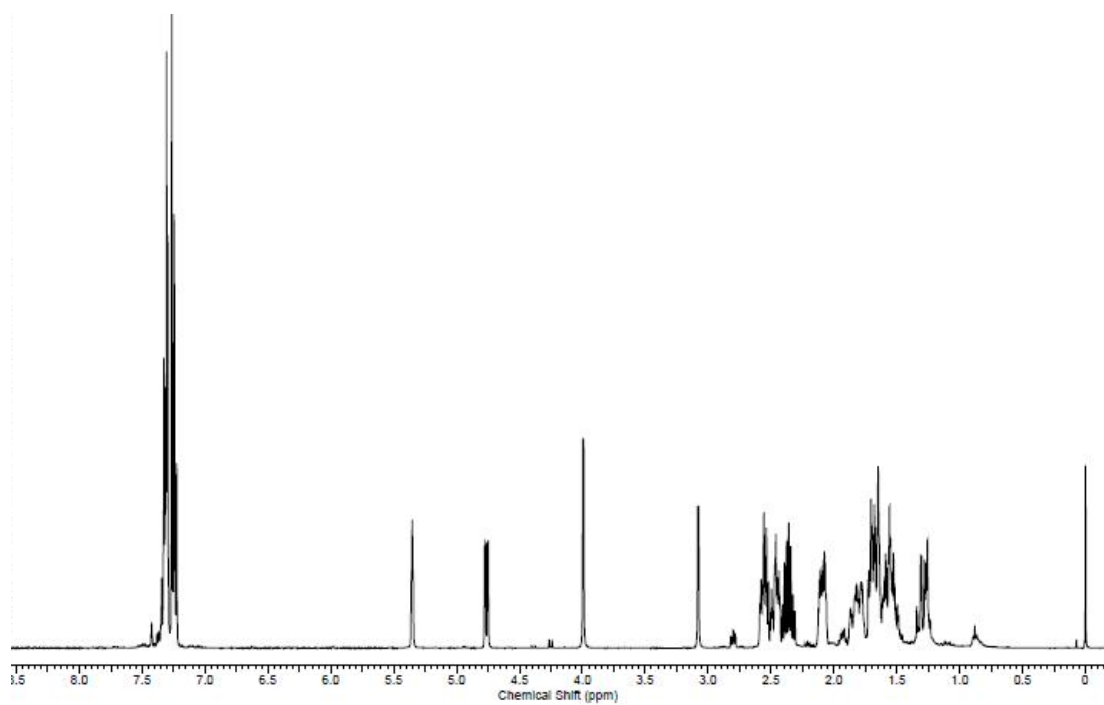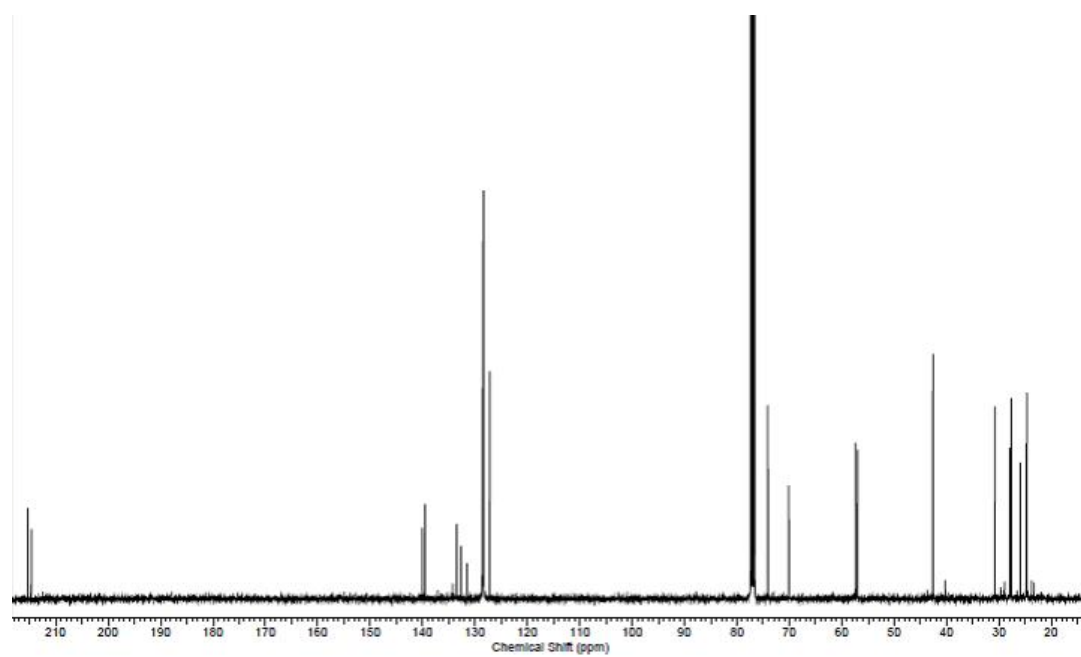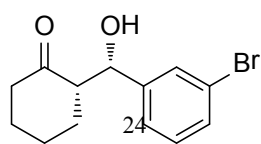

**syn-6j**



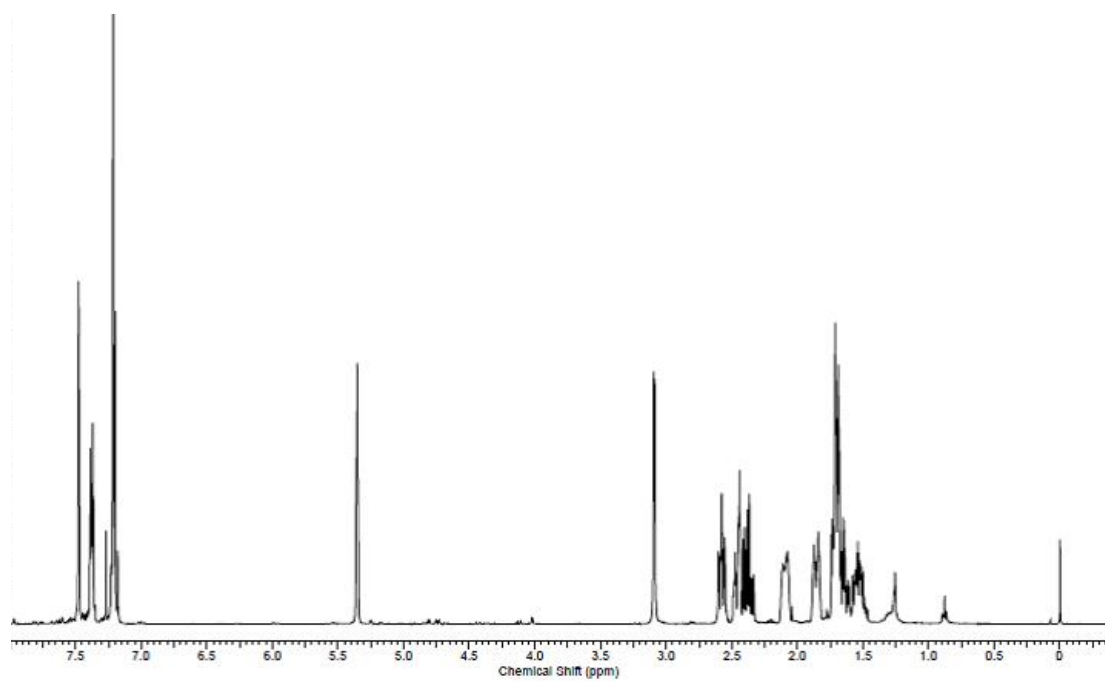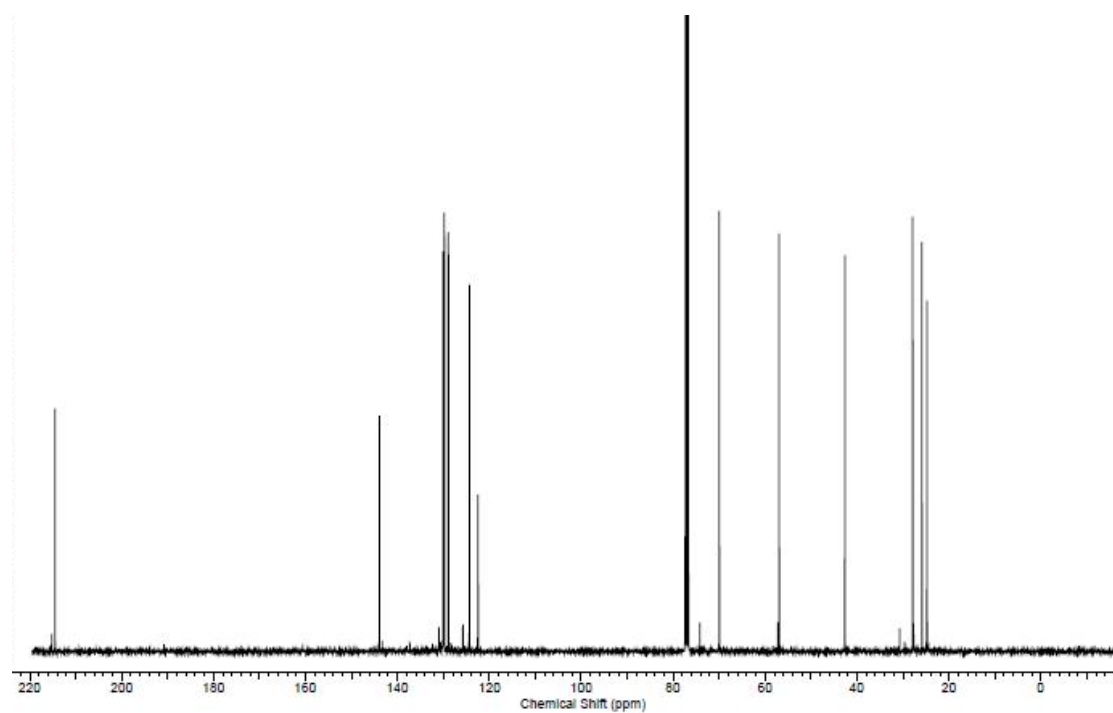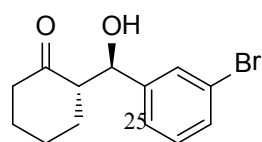

anti-6j

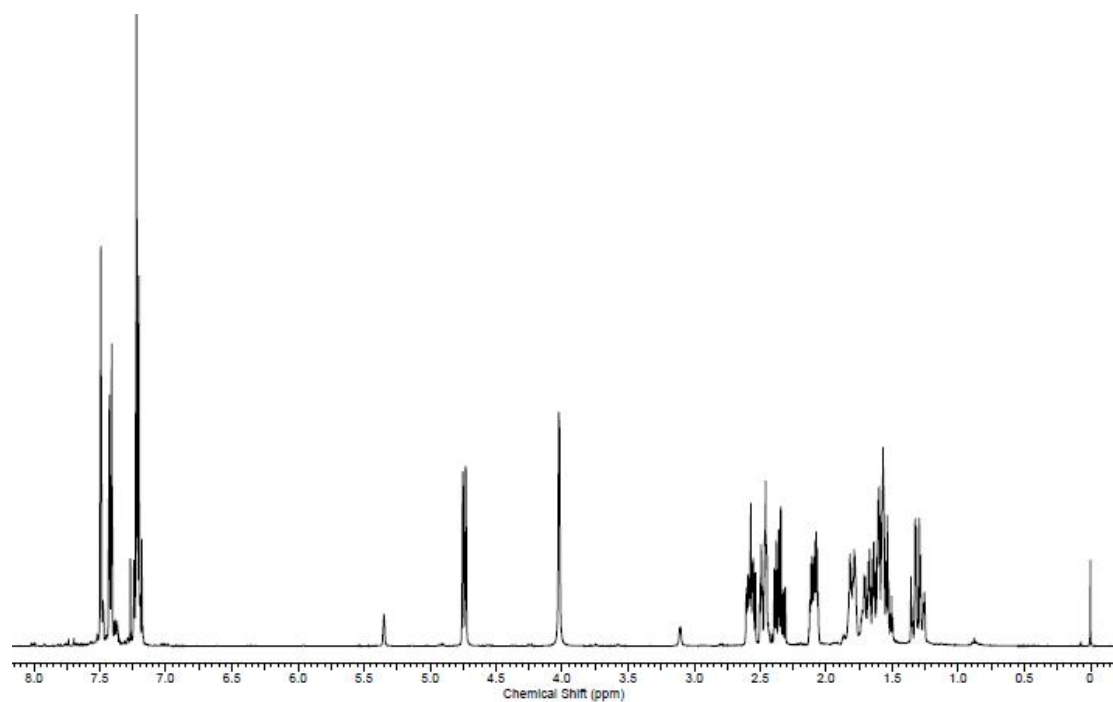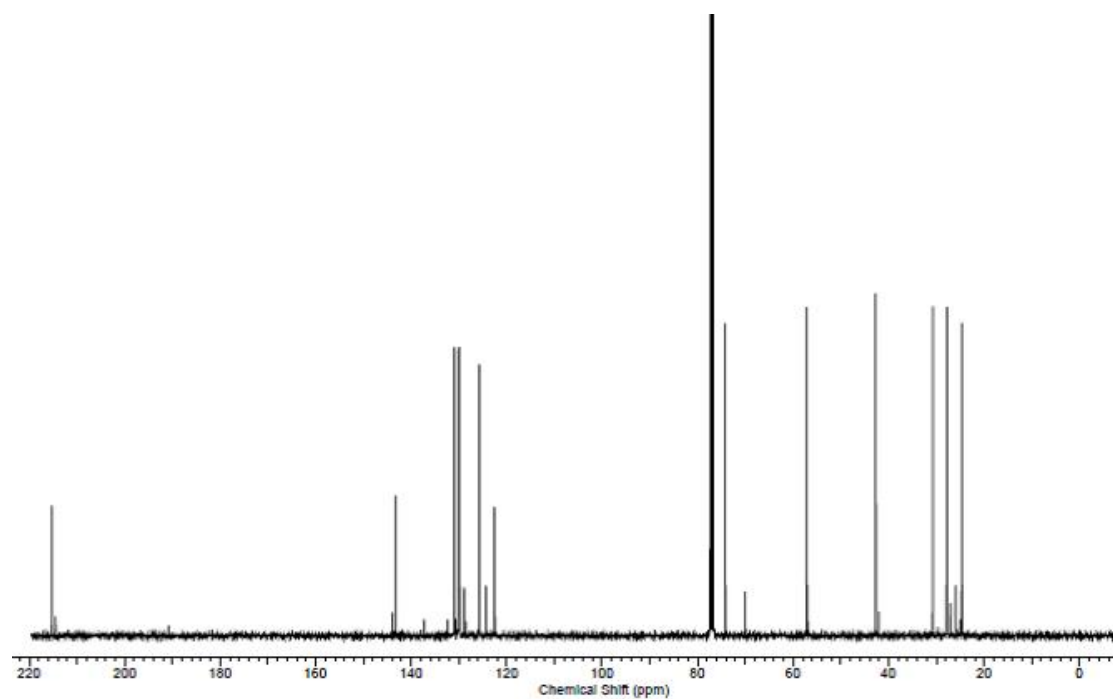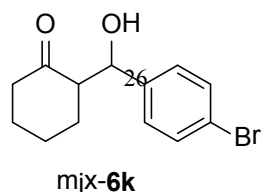

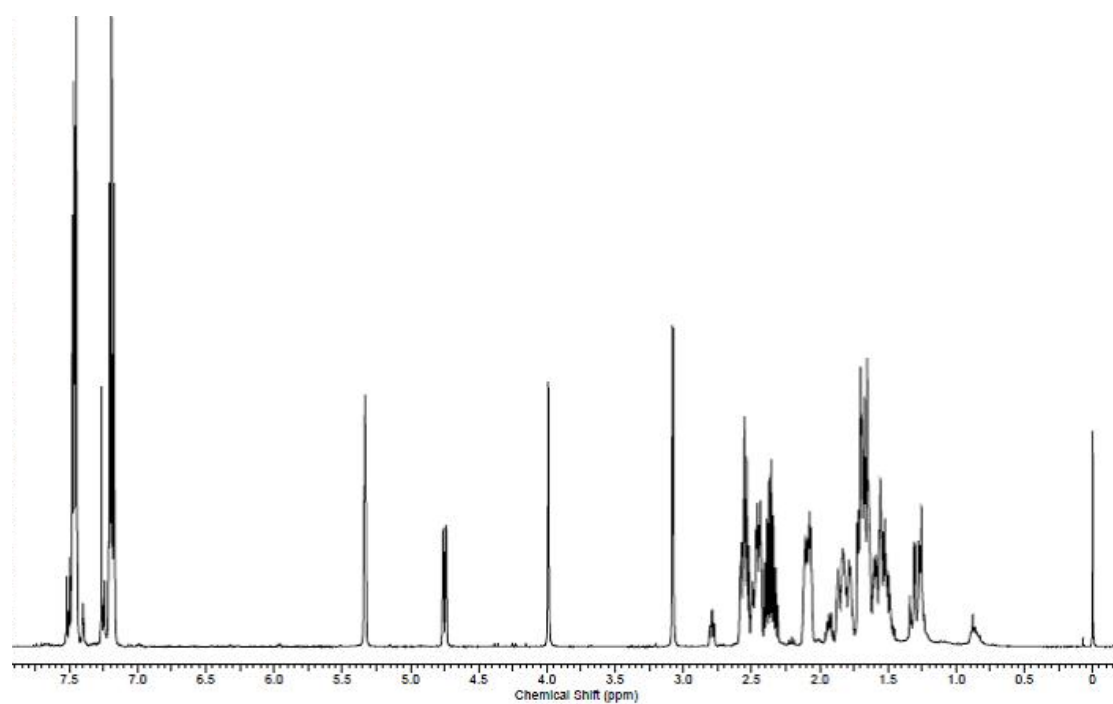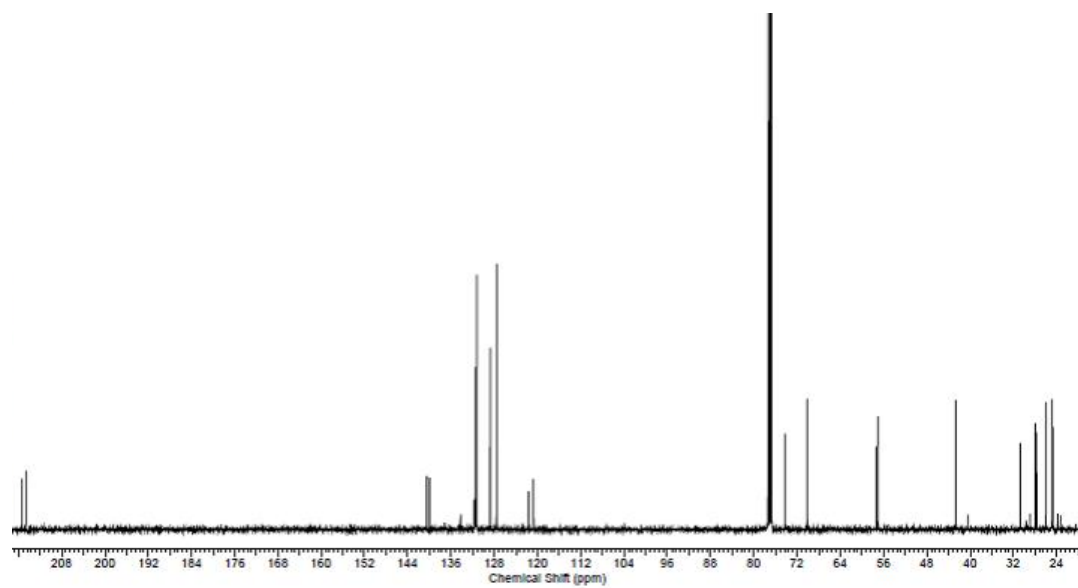

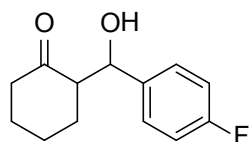

mix-6I

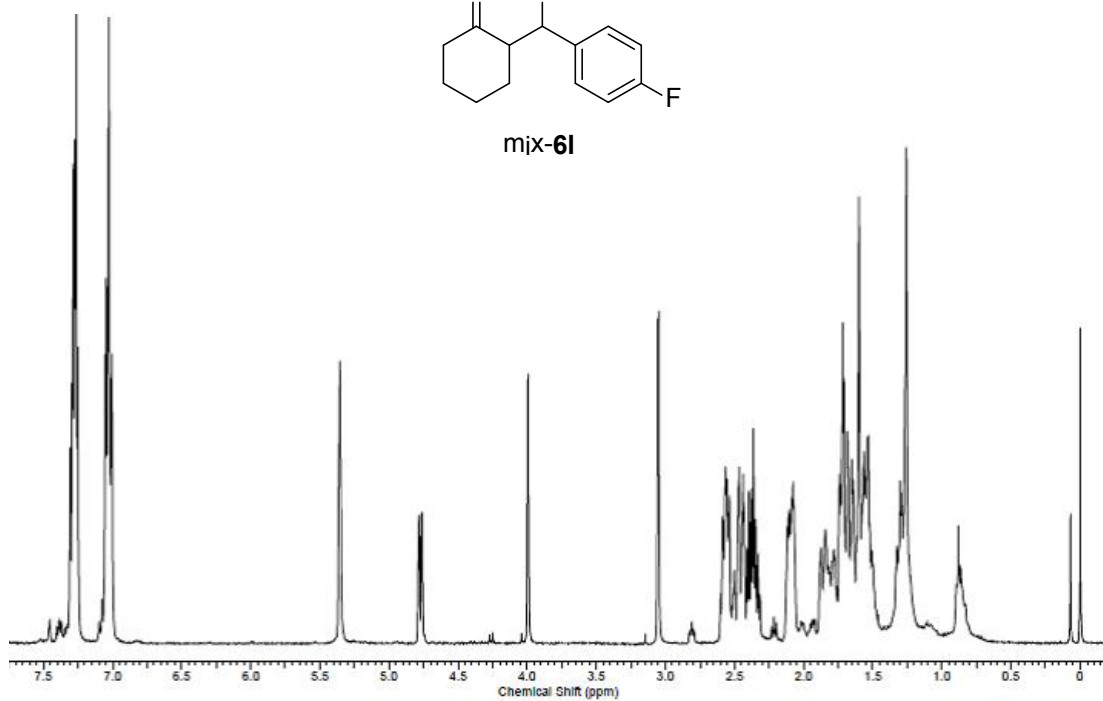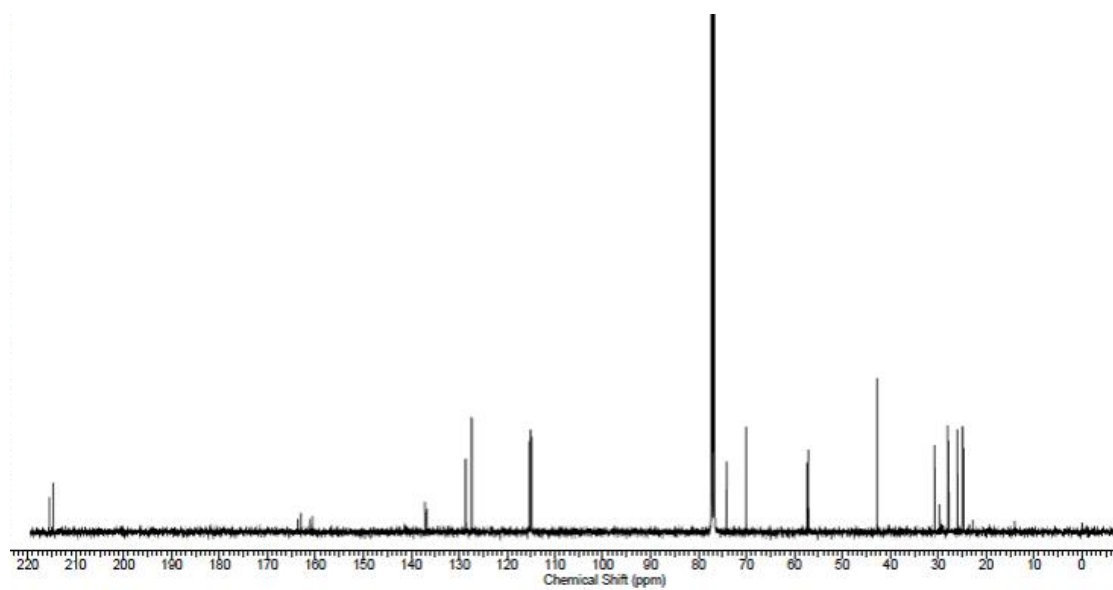

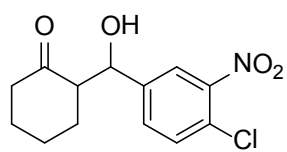

**mix-6m**

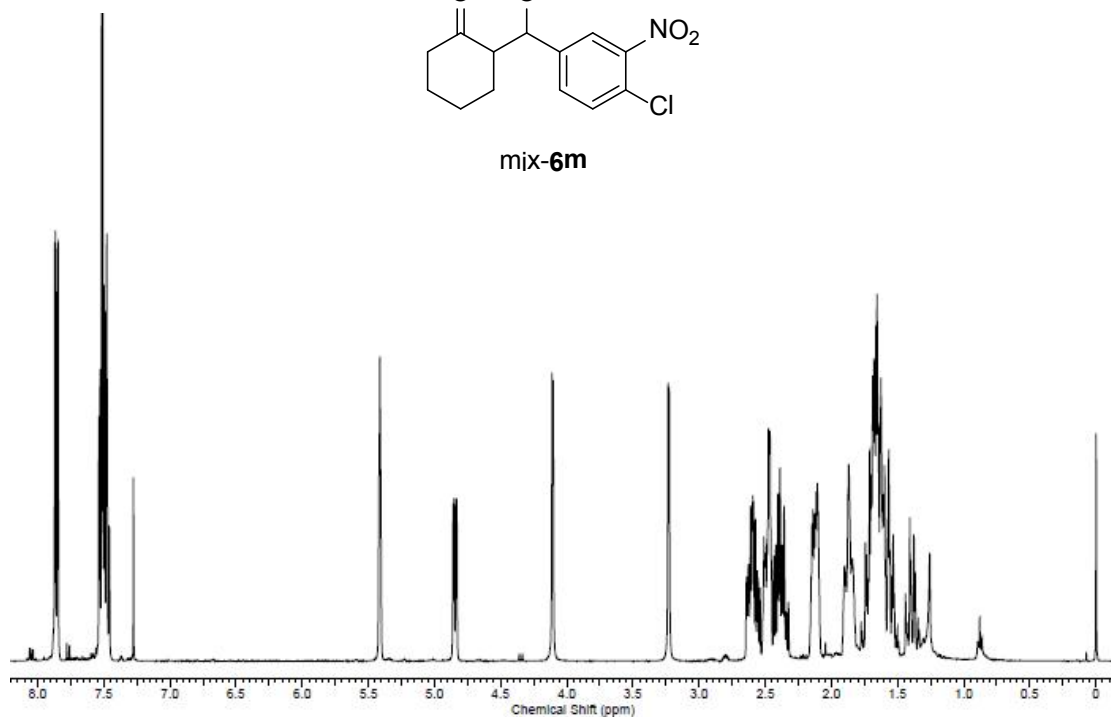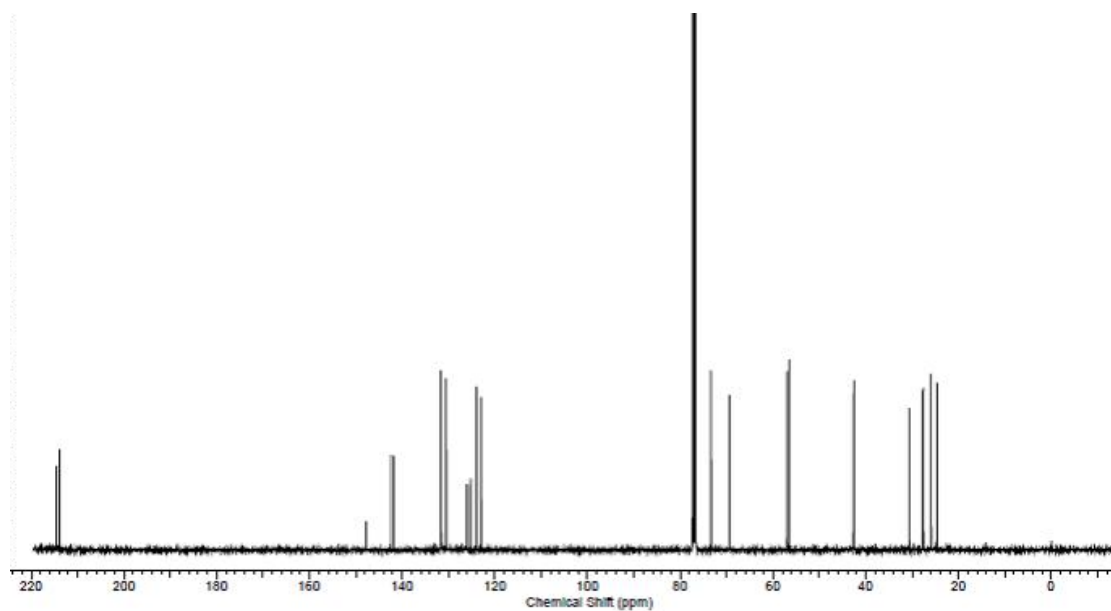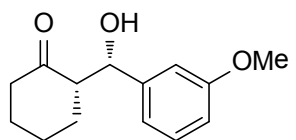

**syn-6n**

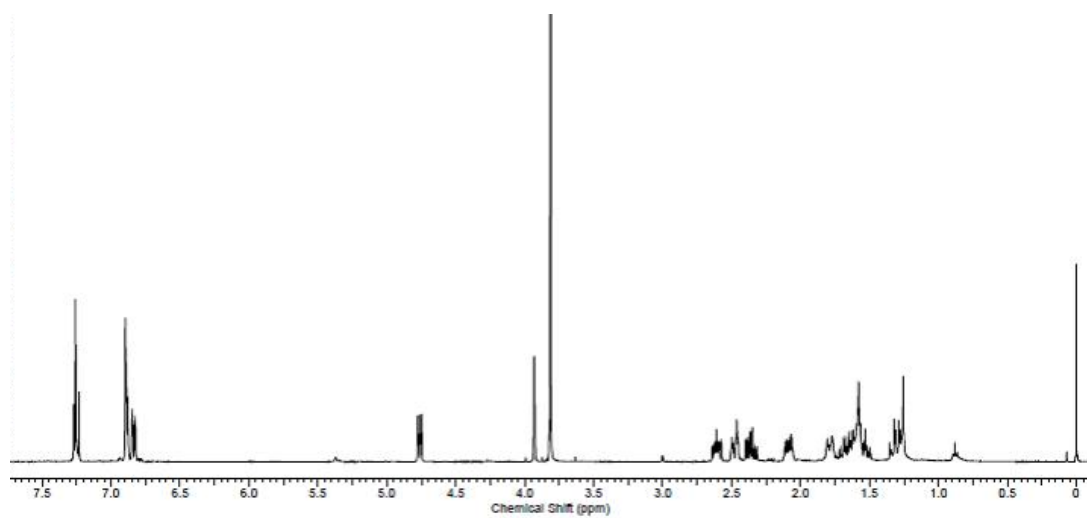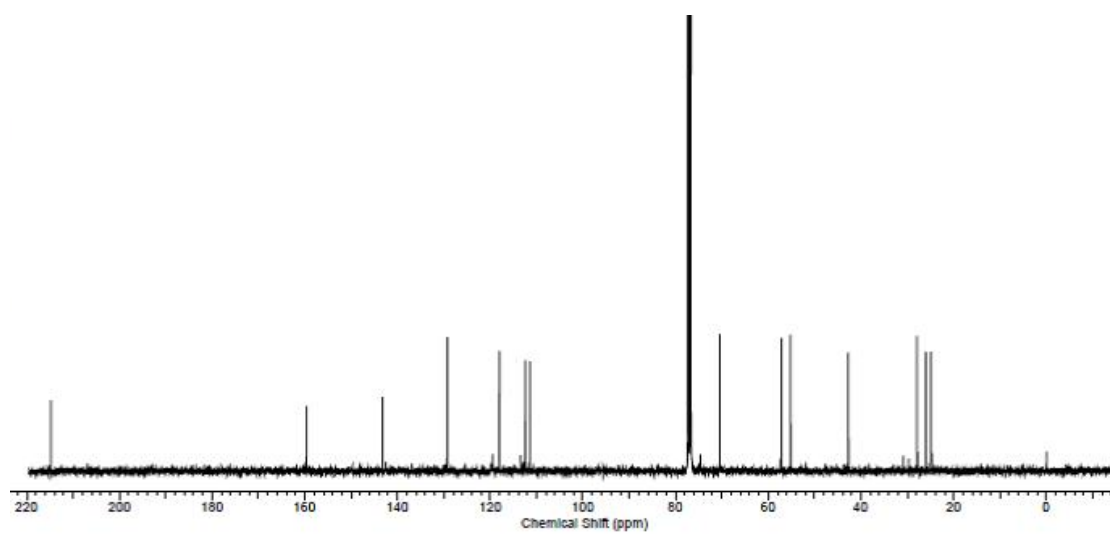

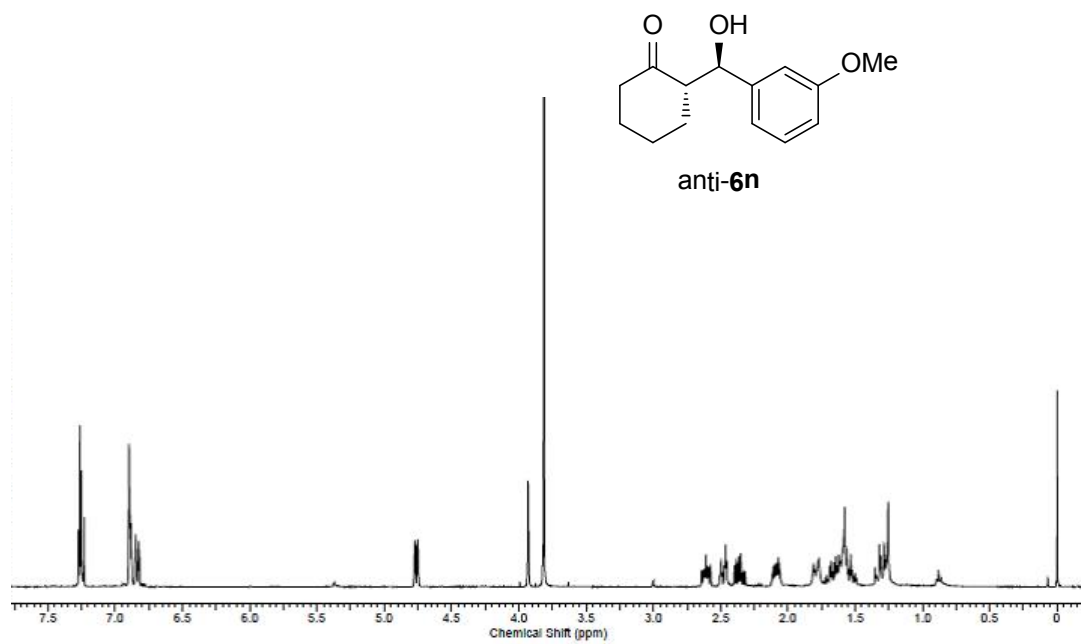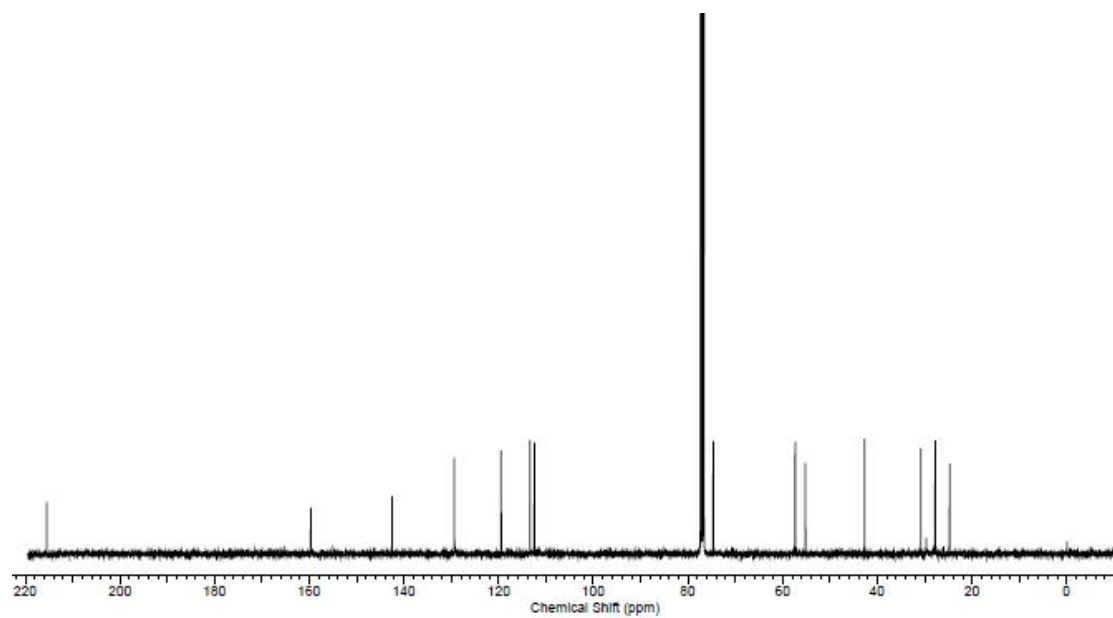

### HPLC Chromatograms for aldol products 6a-n

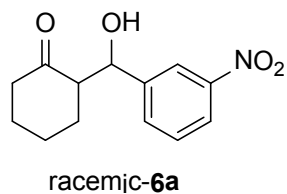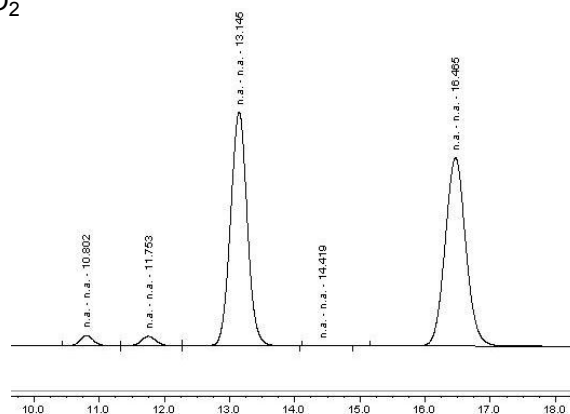

| No.           | Peakname | Ret.Time<br>min | Area<br>mAU*min | Height<br>mAU | Rel.Area<br>%     |
|---------------|----------|-----------------|-----------------|---------------|-------------------|
| 1             | n.a.     | 10.802          | 11.1905         | 46.705        | 1.73              |
| 2             | n.a.     | 11.753          | 11.1699         | 42.602        | 1.73              |
| 3             | n.a.     | 13.145          | 311.2310        | 1051.665      | 48.13             |
| 4             | n.a.     | 14.419          | 0.2870          | 0.794         | 0.04              |
| 5             | n.a.     | 16.465          | 312.8126        | 847.353       | 48.37             |
| <b>Total:</b> |          |                 | <b>646.6909</b> |               | <b>100.000000</b> |

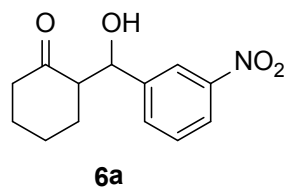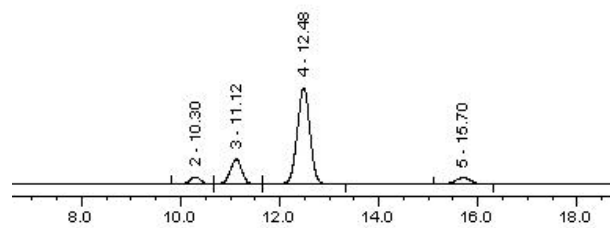

| No.           | Peakname | Ret.Time<br>min | Area<br>mAU*min | Height<br>mAU | Rel.Area<br>%     |
|---------------|----------|-----------------|-----------------|---------------|-------------------|
| 1             | n.a.     | 10.301          | 1.4050          | 5.610         | 4.51              |
| 2             | n.a.     | 11.119          | 5.3011          | 19.439        | 17.02             |
| 3             | n.a.     | 12.482          | 22.5365         | 75.465        | 72.36             |
| 4             | n.a.     | 15.698          | 1.9006          | 5.190         | 6.10              |
| <b>Total:</b> |          |                 | <b>31.1432</b>  |               | <b>100.000000</b> |

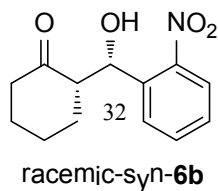



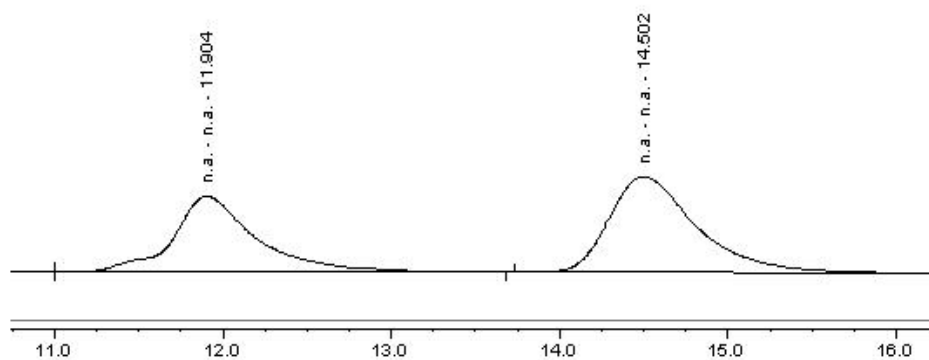

| No.           | Peakname | Ret.Time<br>min | Area<br>mAU*min | Height<br>mAU | Rel.Area<br>%     |
|---------------|----------|-----------------|-----------------|---------------|-------------------|
| 1             | n.a.     | 11.904          | 8.1351          | 14.261        | 42.67             |
| 2             | n.a.     | 14.502          | 10.9281         | 18.073        | 57.33             |
| <b>Total:</b> |          |                 | <b>19.0632</b>  |               | <b>100.000000</b> |

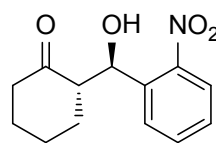

racemic-anti-**6b**

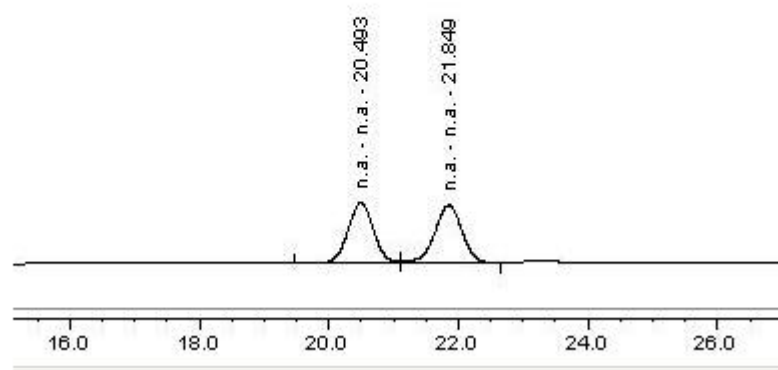

| No.           | Peakname | Ret.Time<br>min | Area<br>mAU*min | Height<br>mAU | Rel.Area<br>%     |
|---------------|----------|-----------------|-----------------|---------------|-------------------|
| 1             | n.a.     | 20.493          | 50.5397         | 109.201       | 49.38             |
| 2             | n.a.     | 21.849          | 51.8028         | 104.661       | 50.62             |
| <b>Total:</b> |          |                 | <b>102.3424</b> |               | <b>100.000000</b> |

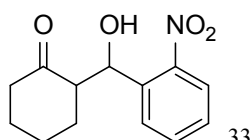

**6b**

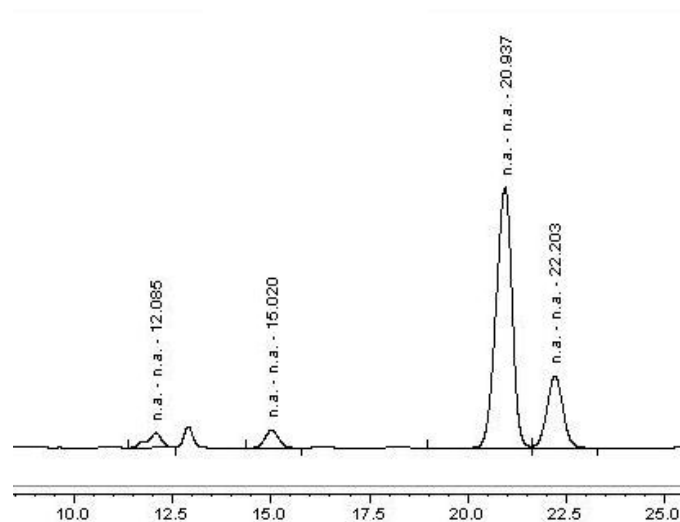

| No.           | Peakname | Ret.Time<br>min | Area<br>mAU*min | Height<br>mAU | Rel.Area<br>%     |
|---------------|----------|-----------------|-----------------|---------------|-------------------|
| 2             | n.a.     | 12.085          | 16.8650         | 39.862        | 3.68              |
| 3             | n.a.     | 15.020          | 18.9581         | 47.798        | 4.14              |
| 4             | n.a.     | 20.937          | 331.1363        | 703.652       | 72.24             |
| 5             | n.a.     | 22.203          | 91.4022         | 193.926       | 19.94             |
| <b>Total:</b> |          |                 | <b>458.3620</b> |               | <b>100.000000</b> |

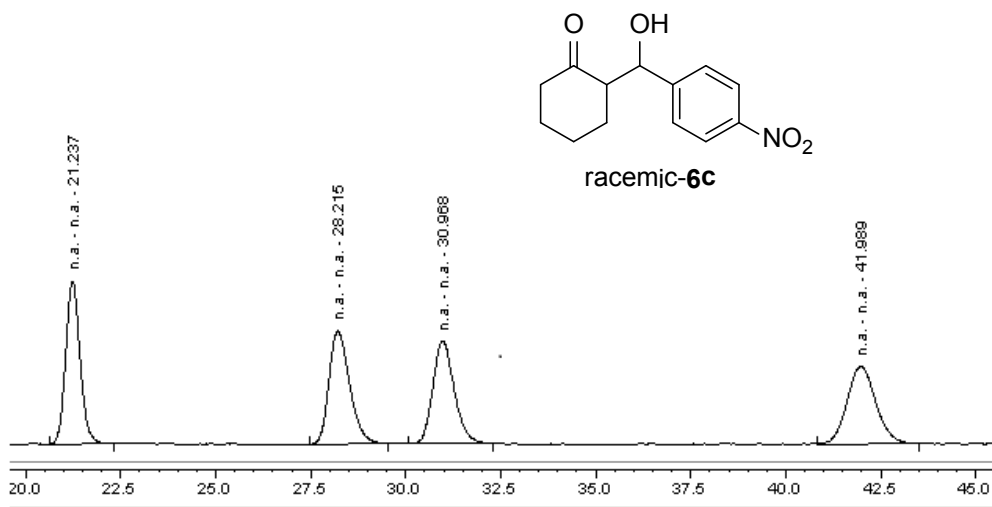

| No.           | Peakname | Ret.Time<br>min | Area<br>mAU*min | Height<br>mAU | Rel.Area<br>%     |
|---------------|----------|-----------------|-----------------|---------------|-------------------|
| 1             | n.a.     | 21.237          | 4.0221          | 9.146         | 25.71             |
| 2             | n.a.     | 28.215          | 3.9978          | 6.341         | 25.56             |
| 3             | n.a.     | 30.968          | 3.7849          | 5.744         | 24.20             |
| 4             | n.a.     | 41.989          | 3.8376          | 4.337         | 24.53             |
| <b>Total:</b> |          |                 | <b>15.6423</b>  |               | <b>100.000000</b> |

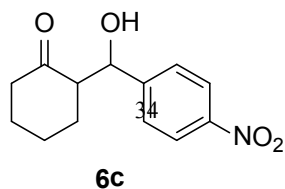

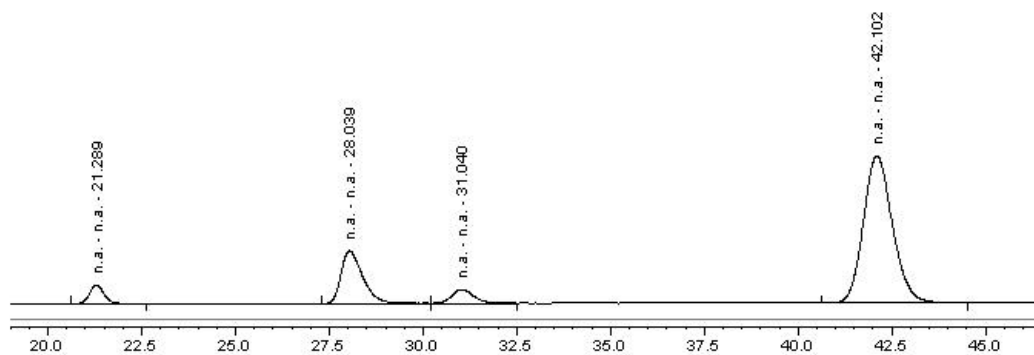

| No.           | Peakname | Ret.Time<br>min | Area<br>mAU*min | Height<br>mAU | Rel.Area<br>%     |
|---------------|----------|-----------------|-----------------|---------------|-------------------|
| 1             | n.a.     | 21.289          | 2.7022          | 5.938         | 4.61              |
| 2             | n.a.     | 28.039          | 11.1358         | 16.622        | 19.01             |
| 3             | n.a.     | 31.040          | 2.9564          | 4.358         | 5.05              |
| 4             | n.a.     | 42.102          | 41.7759         | 46.437        | 71.33             |
| <b>Total:</b> |          |                 | <b>58.5703</b>  |               | <b>100.000000</b> |

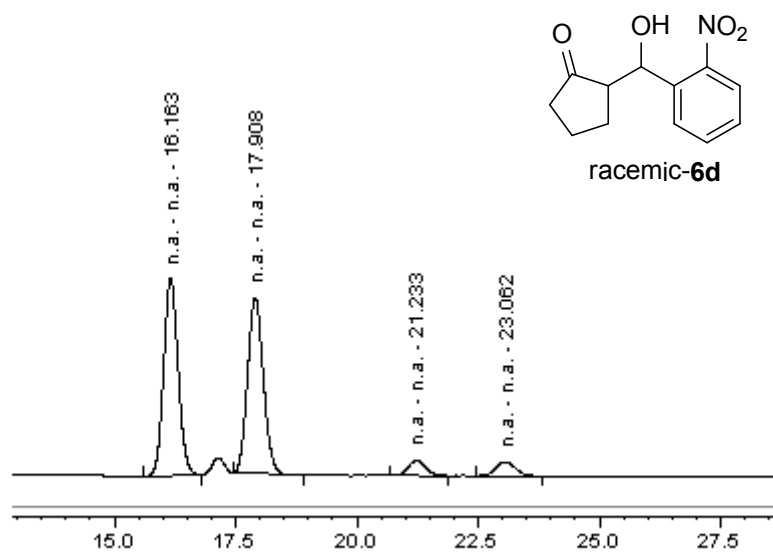

| No.           | Peakname | Ret.Time<br>min | Area<br>mAU*min | Height<br>mAU | Rel.Area<br>%     |
|---------------|----------|-----------------|-----------------|---------------|-------------------|
| 1             | n.a.     | 16.163          | 14.1074         | 40.910        | 46.03             |
| 2             | n.a.     | 17.908          | 13.8398         | 36.561        | 45.15             |
| 3             | n.a.     | 21.233          | 1.3260          | 3.149         | 4.33              |
| 4             | n.a.     | 23.062          | 1.3782          | 2.966         | 4.50              |
| <b>Total:</b> |          |                 | <b>30.6514</b>  |               | <b>100.000000</b> |

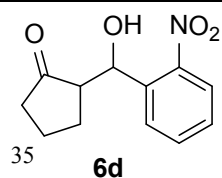

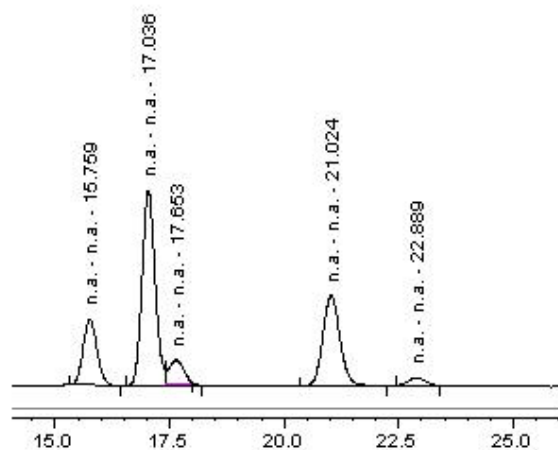

| No.           | Peakname | Ret.Time<br>min | Area<br>mAU*min | Height<br>mAU | Rel.Area<br>%    |
|---------------|----------|-----------------|-----------------|---------------|------------------|
| 1             | n.a.     | 15.759          | 1.3658          | 3.875         | 16.49            |
| 2             | n.a.     | 17.036          | 3.9090          | 11.490        | 47.20            |
| 3             | n.a.     | 17.653          | 0.4838          | 1.361         | 5.84             |
| 4             | n.a.     | 21.024          | 2.3218          | 5.309         | 28.03            |
| 5             | n.a.     | 22.889          | 0.2022          | 0.466         | 2.44             |
| <b>Total:</b> |          |                 | <b>8.2826</b>   |               | <b>100.00000</b> |

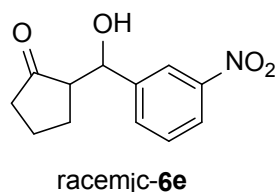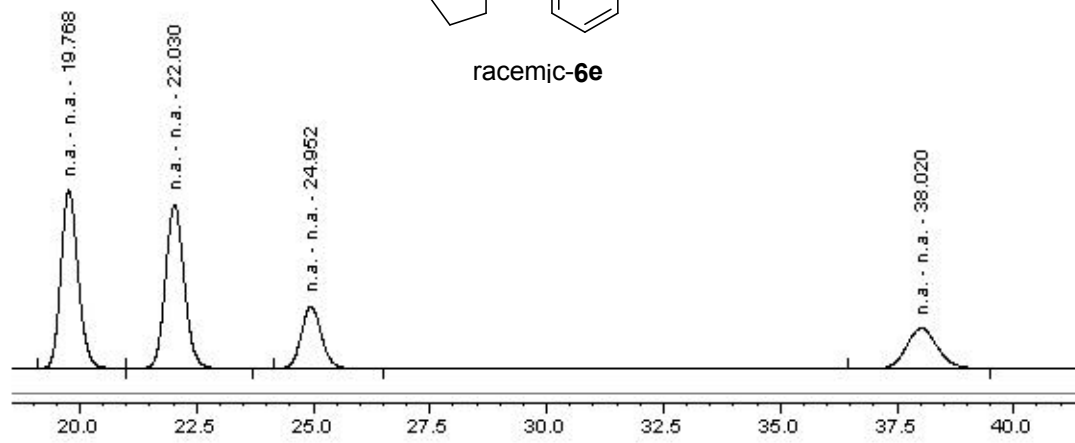

| No.           | Peakname | Ret.Time<br>min | Area<br>mAU*min | Height<br>mAU | Rel.Area<br>%    |
|---------------|----------|-----------------|-----------------|---------------|------------------|
| 1             | n.a.     | 19.768          | 31.2147         | 72.985        | 35.47            |
| 2             | n.a.     | 22.030          | 31.3909         | 67.099        | 35.67            |
| 3             | n.a.     | 24.952          | 12.6794         | 25.365        | 14.41            |
| 4             | n.a.     | 38.020          | 12.7086         | 16.507        | 14.44            |
| <b>Total:</b> |          |                 | <b>87.9935</b>  |               | <b>100.00000</b> |

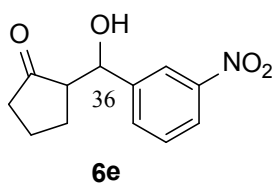

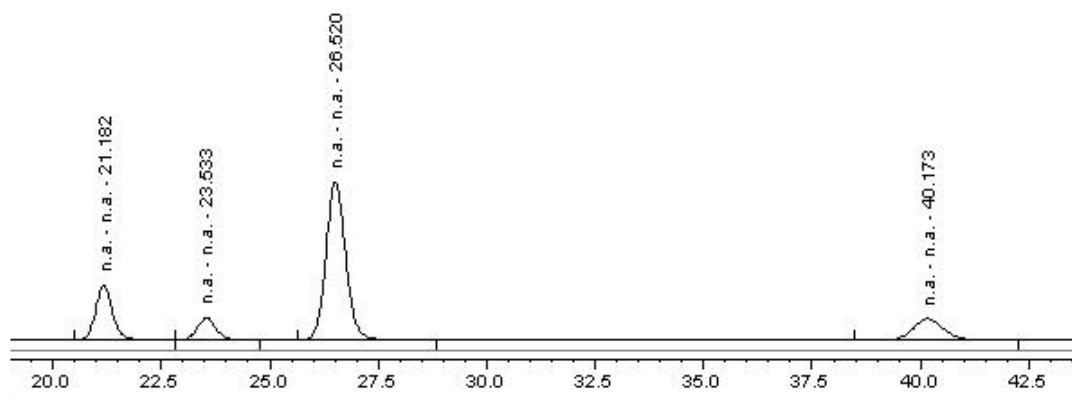

| No.           | Peakname | Ret.Time<br>min | Area<br>mAU*min | Height<br>mAU | Rel.Area<br>%    |
|---------------|----------|-----------------|-----------------|---------------|------------------|
| 1             | n.a.     | 21.182          | 9.3865          | 21.029        | 18.02            |
| 2             | n.a.     | 23.533          | 4.0830          | 8.377         | 7.84             |
| 3             | n.a.     | 26.520          | 32.0632         | 60.584        | 61.56            |
| 4             | n.a.     | 40.173          | 6.5540          | 8.099         | 12.58            |
| <b>Total:</b> |          |                 | <b>52.0866</b>  |               | <b>100.00000</b> |

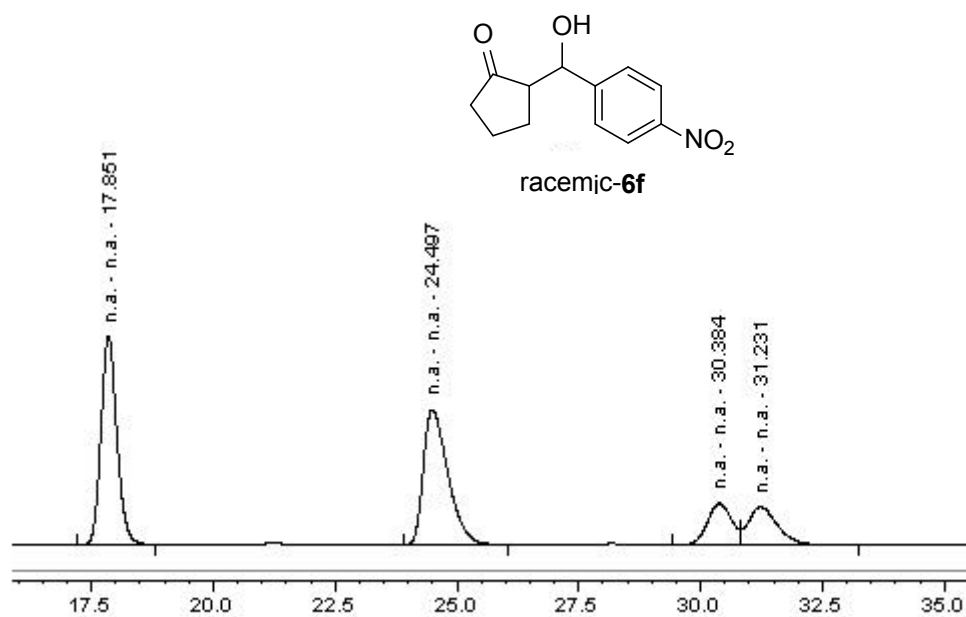

| No.           | Peakname | Ret.Time<br>min | Area<br>mAU*min | Height<br>mAU | Rel.Area<br>%    |
|---------------|----------|-----------------|-----------------|---------------|------------------|
| 1             | n.a.     | 17.851          | 30.9818         | 81.696        | 37.82            |
| 2             | n.a.     | 24.497          | 30.9947         | 53.138        | 37.84            |
| 3             | n.a.     | 30.384          | 9.4381          | 16.239        | 11.52            |
| 4             | n.a.     | 31.231          | 10.5050         | 14.987        | 12.82            |
| <b>Total:</b> |          |                 | <b>81.9196</b>  |               | <b>100.00000</b> |

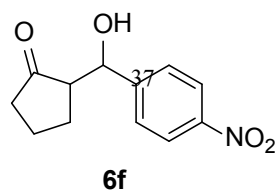

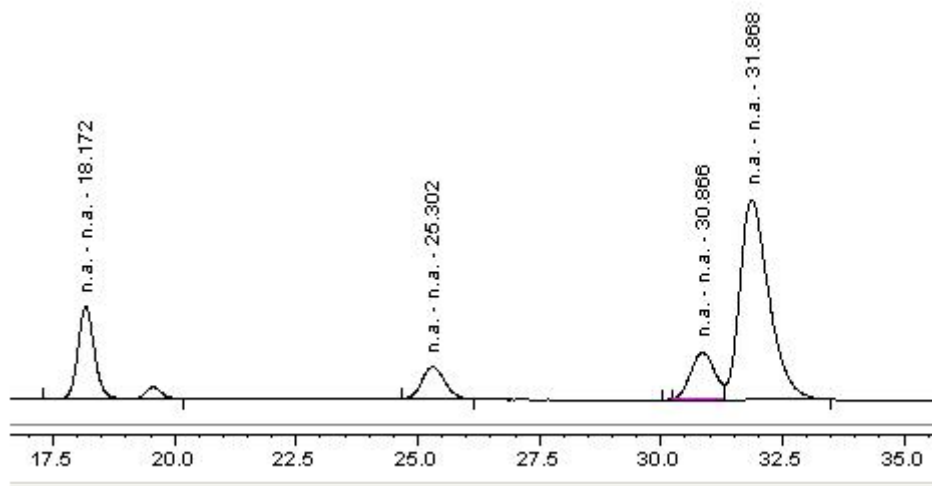

| No.           | Peakname | Ret.Time<br>min | Area<br>mAU*min | Height<br>mAU | Rel.Area<br>%    |
|---------------|----------|-----------------|-----------------|---------------|------------------|
| 1             | n.a.     | 18.172          | 2.9557          | 6.781         | 17.73            |
| 2             | n.a.     | 25.302          | 1.2834          | 2.354         | 7.70             |
| 3             | n.a.     | 30.866          | 1.9973          | 3.473         | 11.98            |
| 4             | n.a.     | 31.868          | 10.4308         | 14.813        | 62.58            |
| <b>Total:</b> |          |                 | <b>16.6672</b>  |               | <b>100.00000</b> |

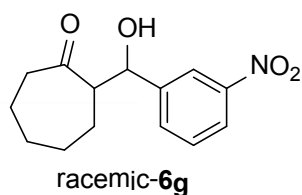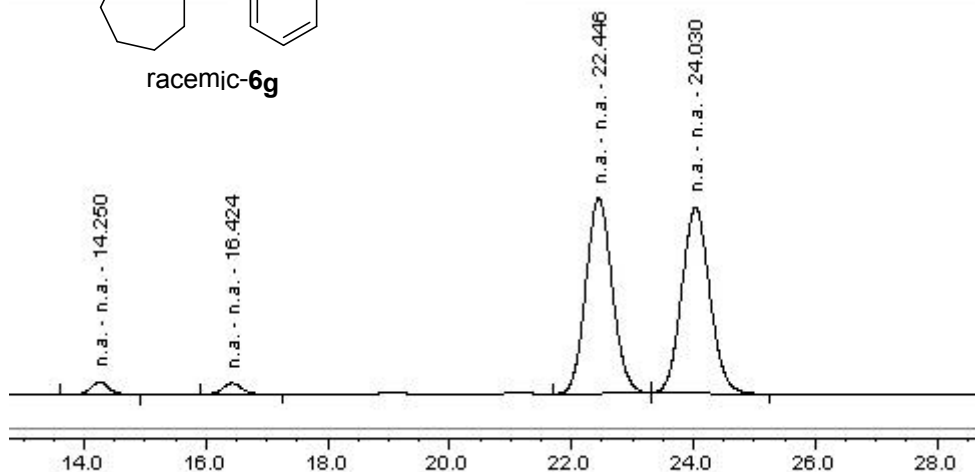

| No.           | Peakname | Ret.Time<br>min | Area<br>mAU*min | Height<br>mAU | Rel.Area<br>%    |
|---------------|----------|-----------------|-----------------|---------------|------------------|
| 1             | n.a.     | 14.250          | 1.2187          | 3.746         | 1.98             |
| 2             | n.a.     | 16.424          | 1.2045          | 3.250         | 1.96             |
| 3             | n.a.     | 22.446          | 29.3570         | 58.511        | 47.69            |
| 4             | n.a.     | 24.030          | 29.7721         | 55.627        | 48.37            |
| <b>Total:</b> |          |                 | <b>61.5524</b>  |               | <b>100.00000</b> |

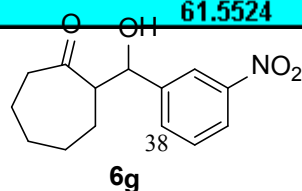

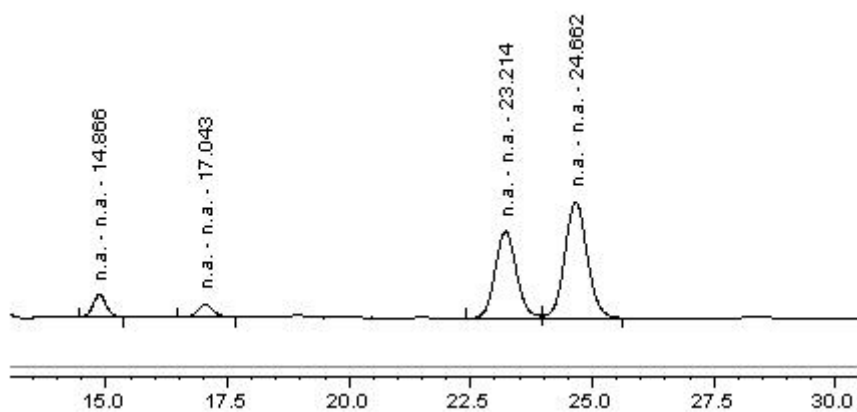

| No.           | Peakname | Ret.Time<br>min | Area<br>mAU*min | Height<br>mAU | Rel.Area<br>%     |
|---------------|----------|-----------------|-----------------|---------------|-------------------|
| 1             | n.a.     | 14.866          | 0.7414          | 2.299         | 6.05              |
| 2             | n.a.     | 17.043          | 0.5004          | 1.338         | 4.08              |
| 3             | n.a.     | 23.214          | 4.5774          | 9.001         | 37.33             |
| 4             | n.a.     | 24.662          | 6.4422          | 12.034        | 52.54             |
| <b>Total:</b> |          |                 | <b>12.2614</b>  |               | <b>100.000000</b> |

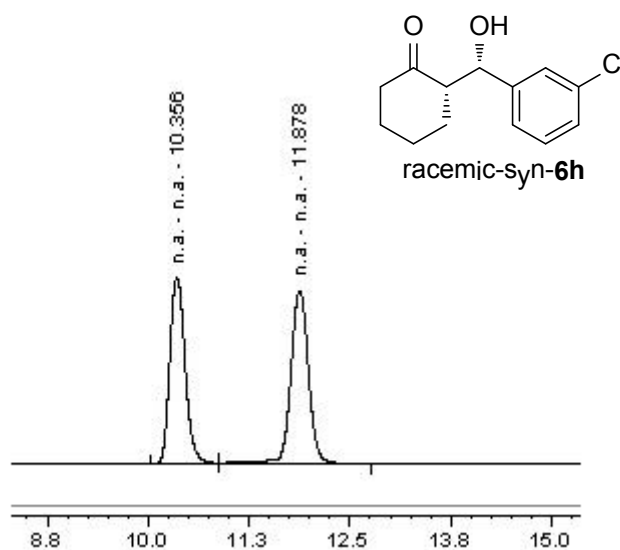

| No.           | Peakname | Ret.Time<br>min | Area<br>mAU*min  | Height<br>mAU | Rel.Area<br>%     |
|---------------|----------|-----------------|------------------|---------------|-------------------|
| 1             | n.a.     | 10.356          | 480.7298         | 2155.678      | 47.87             |
| 2             | n.a.     | 11.878          | 523.5057         | 2003.445      | 52.13             |
| <b>Total:</b> |          |                 | <b>1004.2354</b> |               | <b>100.000000</b> |

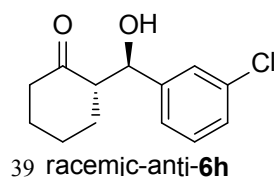

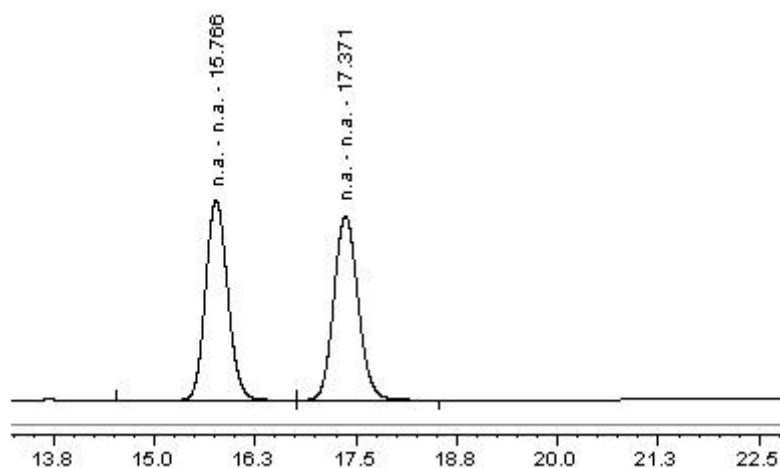

| No.           | Peakname | Ret.Time<br>min | Area<br>mAU*min  | Height<br>mAU | Rel.Area<br>%     |
|---------------|----------|-----------------|------------------|---------------|-------------------|
| 1             | n.a.     | 15.766          | 543.9930         | 1707.031      | 49.76             |
| 2             | n.a.     | 17.371          | 549.3037         | 1577.142      | 50.24             |
| <b>Total:</b> |          |                 | <b>1093.2967</b> |               | <b>100.000000</b> |

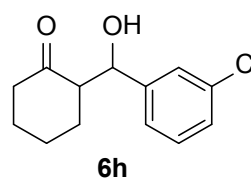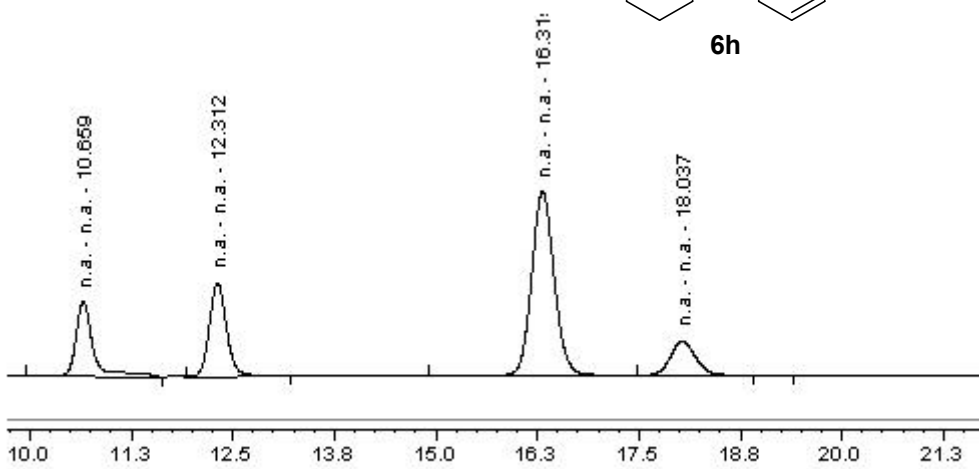

| No.           | Peakname | Ret.Time<br>min | Area<br>mAU*min | Height<br>mAU | Rel.Area<br>%     |
|---------------|----------|-----------------|-----------------|---------------|-------------------|
| 1             | n.a.     | 10.659          | 20.5346         | 85.566        | 15.96             |
| 2             | n.a.     | 12.312          | 26.2114         | 107.829       | 20.37             |
| 3             | n.a.     | 16.315          | 68.1544         | 212.127       | 52.97             |
| 4             | n.a.     | 18.037          | 13.7727         | 39.098        | 10.70             |
| <b>Total:</b> |          |                 | <b>128.6731</b> |               | <b>100.000000</b> |

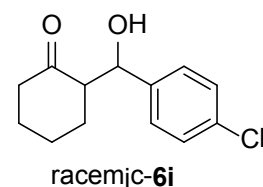



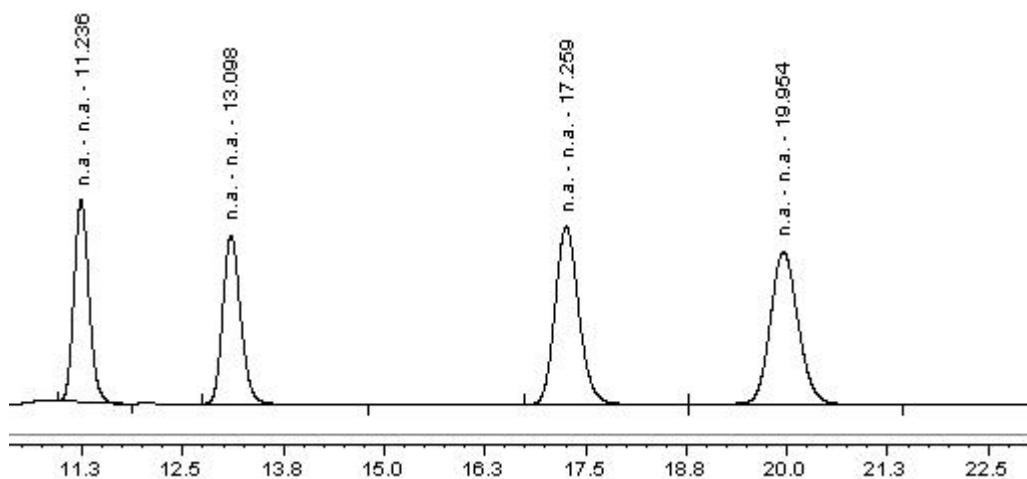

| No.           | Peakname | Ret.Time<br>min | Area<br>mAU*min | Height<br>mAU | Rel.Area<br>%    |
|---------------|----------|-----------------|-----------------|---------------|------------------|
| 1             | n.a.     | 11.236          | 150.3882        | 698.903       | 20.75            |
| 2             | n.a.     | 13.098          | 150.0434        | 583.817       | 20.71            |
| 3             | n.a.     | 17.259          | 211.1609        | 615.929       | 29.14            |
| 4             | n.a.     | 19.954          | 212.9961        | 528.005       | 29.40            |
| <b>Total:</b> |          |                 | <b>724.5887</b> |               | <b>100.00000</b> |

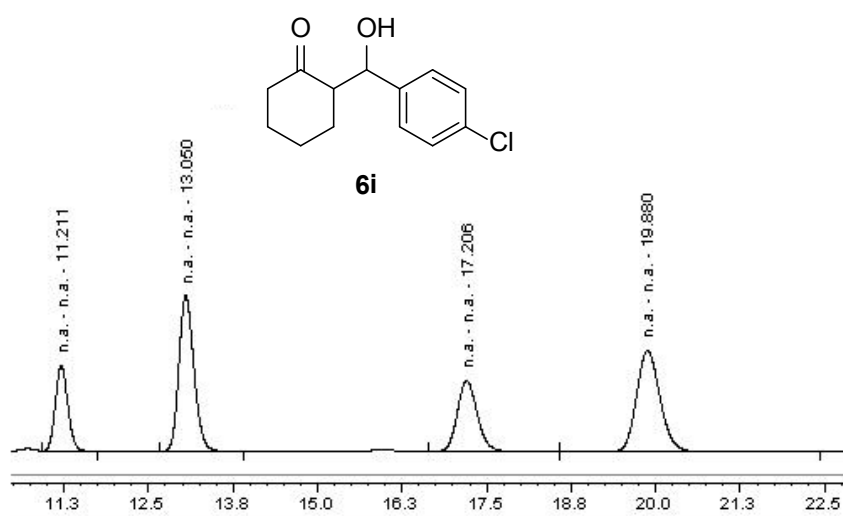

| No.           | Peakname | Ret.Time<br>min | Area<br>mAU*min  | Height<br>mAU | Rel.Area<br>%    |
|---------------|----------|-----------------|------------------|---------------|------------------|
| 1             | n.a.     | 11.211          | 161.0607         | 754.458       | 14.86            |
| 2             | n.a.     | 13.050          | 354.4753         | 1372.281      | 32.71            |
| 3             | n.a.     | 17.206          | 212.0110         | 623.679       | 19.56            |
| 4             | n.a.     | 19.880          | 356.1520         | 890.713       | 32.86            |
| <b>Total:</b> |          |                 | <b>1083.6990</b> |               | <b>100.00000</b> |

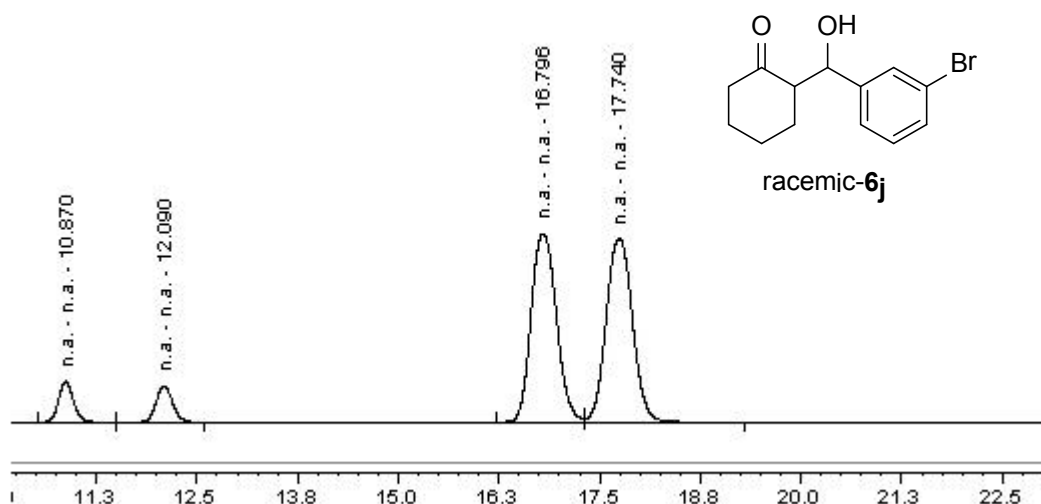

| No.           | Peakname | Ret.Time<br>min | Area<br>mAU*min  | Height<br>mAU | Rel.Area<br>%     |
|---------------|----------|-----------------|------------------|---------------|-------------------|
| 1             | n.a.     | 10.870          | 108.9754         | 514.621       | 5.52              |
| 2             | n.a.     | 12.090          | 108.0979         | 459.314       | 5.48              |
| 3             | n.a.     | 16.796          | 870.5441         | 2386.878      | 44.12             |
| 4             | n.a.     | 17.740          | 885.3910         | 2333.450      | 44.88             |
| <b>Total:</b> |          |                 | <b>1973.0084</b> |               | <b>100.000000</b> |

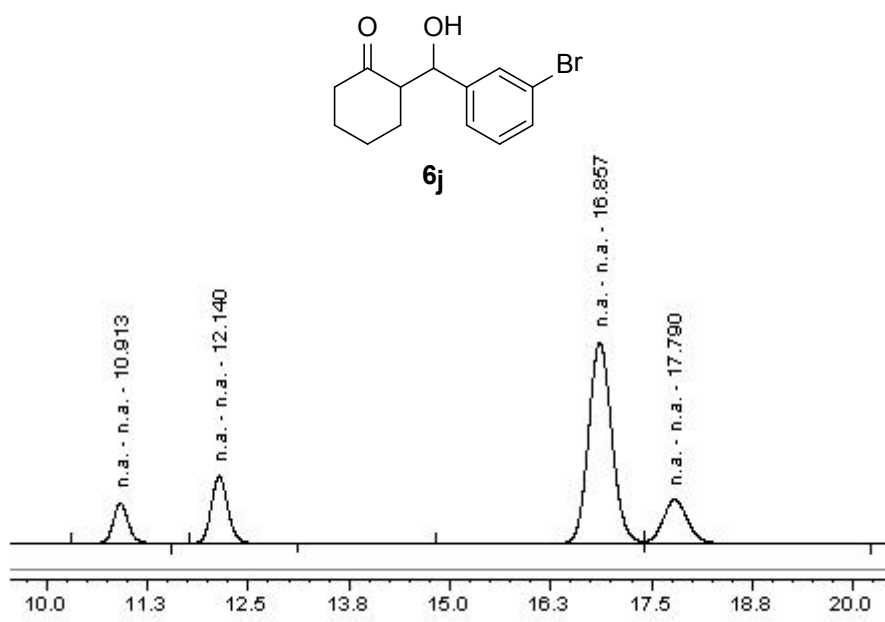

| No.           | Peakname | Ret.Time<br>min | Area<br>mAU*min | Height<br>mAU | Rel.Area<br>%     |
|---------------|----------|-----------------|-----------------|---------------|-------------------|
| 1             | n.a.     | 10.913          | 33.7491         | 158.881       | 8.07              |
| 2             | n.a.     | 12.140          | 61.9554         | 262.637       | 14.81             |
| 3             | n.a.     | 16.857          | 262.4087        | 787.627       | 62.72             |
| 4             | n.a.     | 17.790          | 60.2767         | 171.333       | 14.41             |
| <b>Total:</b> |          |                 | <b>418.3898</b> |               | <b>100.000000</b> |

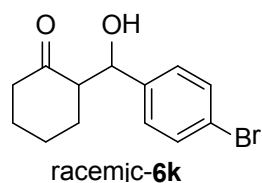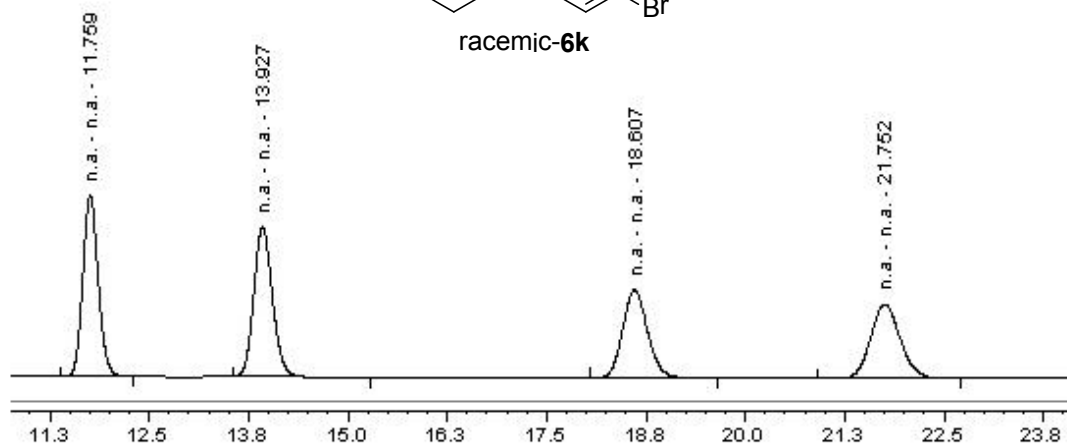

| No.           | Peakname | Ret.Time<br>min | Area<br>mAU*min | Height<br>mAU | Rel.Area<br>%     |
|---------------|----------|-----------------|-----------------|---------------|-------------------|
| 1             | n.a.     | 11.759          | 81.9121         | 362.974       | 28.12             |
| 2             | n.a.     | 13.927          | 81.0752         | 300.180       | 27.83             |
| 3             | n.a.     | 18.607          | 64.2414         | 175.867       | 22.05             |
| 4             | n.a.     | 21.752          | 64.0890         | 148.233       | 22.00             |
| <b>Total:</b> |          |                 | <b>291.3177</b> |               | <b>100.000000</b> |

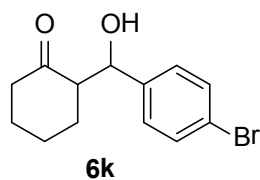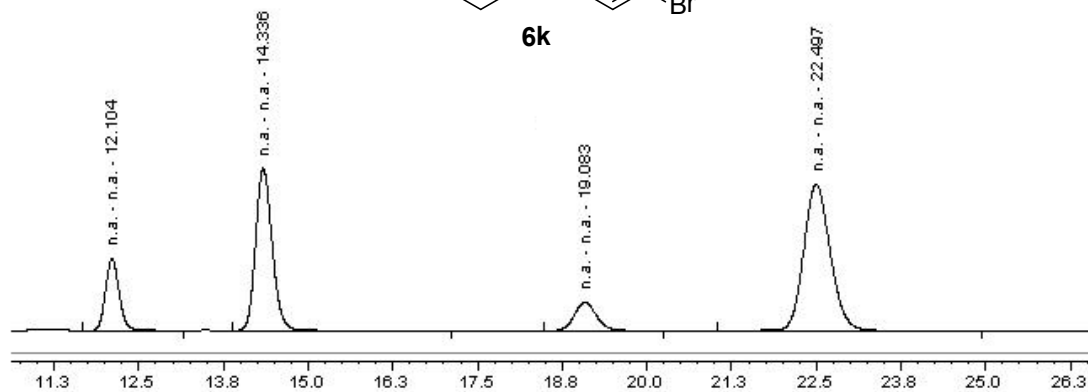

| No.           | Peakname | Ret.Time<br>min | Area<br>mAU*min | Height<br>mAU | Rel.Area<br>%     |
|---------------|----------|-----------------|-----------------|---------------|-------------------|
| 1             | n.a.     | 12.104          | 80.7843         | 338.209       | 12.32             |
| 2             | n.a.     | 14.336          | 215.4357        | 757.735       | 32.84             |
| 3             | n.a.     | 19.083          | 49.7389         | 132.100       | 7.58              |
| 4             | n.a.     | 22.497          | 309.9908        | 683.065       | 47.26             |
| <b>Total:</b> |          |                 | <b>655.9497</b> |               | <b>100.000000</b> |

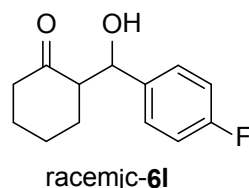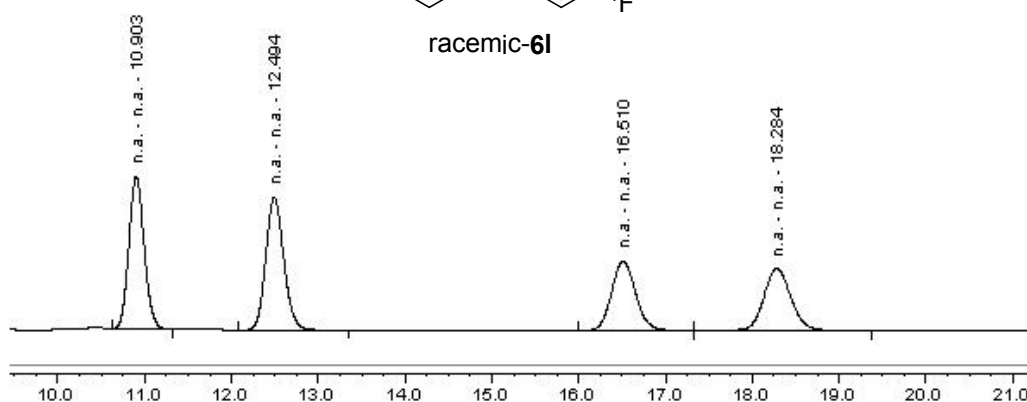

| No.           | Peakname | Ret.Time<br>min | Area<br>mAU*min | Height<br>mAU | Rel.Area<br>%    |
|---------------|----------|-----------------|-----------------|---------------|------------------|
| 1             | n.a.     | 10.903          | 46.4014         | 225.386       | 29.20            |
| 2             | n.a.     | 12.494          | 47.2134         | 195.790       | 29.71            |
| 3             | n.a.     | 16.510          | 32.4676         | 102.329       | 20.43            |
| 4             | n.a.     | 18.284          | 32.8202         | 91.203        | 20.65            |
| <b>Total:</b> |          |                 | <b>158.9026</b> |               | <b>100.00000</b> |

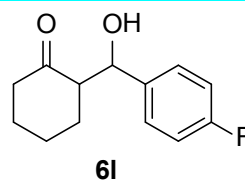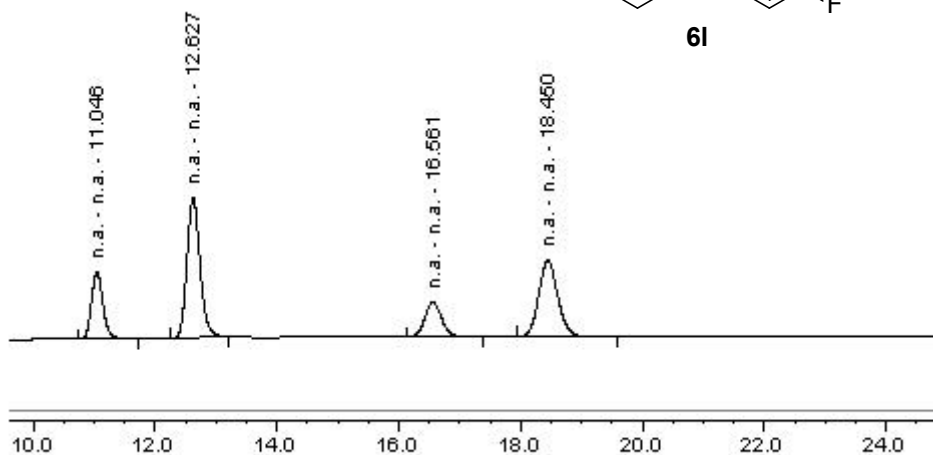

| No.           | Peakname | Ret.Time<br>min | Area<br>mAU*min | Height<br>mAU | Rel.Area<br>%    |
|---------------|----------|-----------------|-----------------|---------------|------------------|
| 1             | n.a.     | 11.046          | 10.2121         | 46.201        | 16.78            |
| 2             | n.a.     | 12.627          | 24.1198         | 96.512        | 39.64            |
| 3             | n.a.     | 16.561          | 7.6209          | 23.665        | 12.52            |
| 4             | n.a.     | 18.450          | 18.8975         | 52.302        | 31.06            |
| <b>Total:</b> |          |                 | <b>60.8503</b>  |               | <b>100.00000</b> |

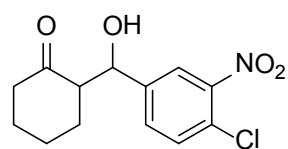

racemic-6m

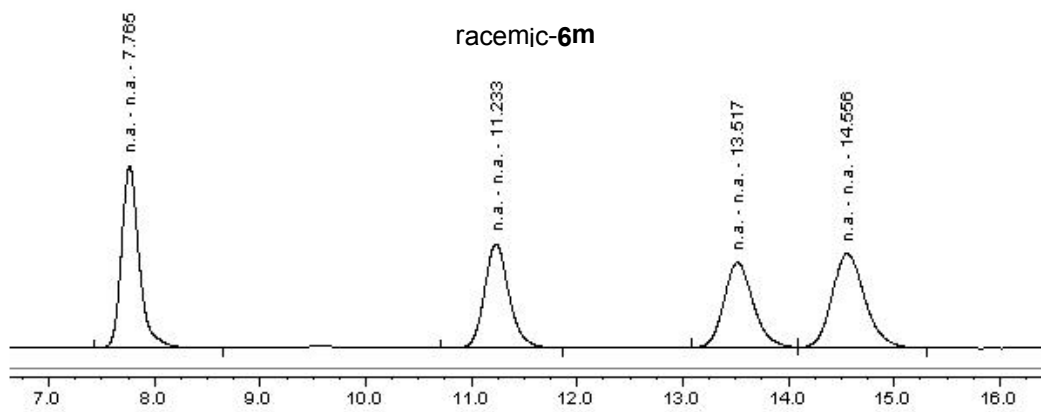

| No.           | Peakname | Ret.Time<br>min | Area<br>mAU*min | Height<br>mAU | Rel.Area<br>%     |
|---------------|----------|-----------------|-----------------|---------------|-------------------|
| 1             | n.a.     | 7.765           | 8.9400          | 45.965        | 28.42             |
| 2             | n.a.     | 11.233          | 7.0660          | 26.255        | 22.46             |
| 3             | n.a.     | 13.517          | 6.8875          | 21.437        | 21.90             |
| 4             | n.a.     | 14.556          | 8.5608          | 23.748        | 27.22             |
| <b>Total:</b> |          |                 | <b>31.4544</b>  |               | <b>100.000000</b> |

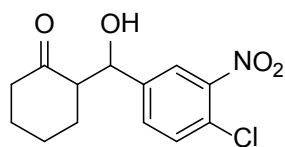

6m

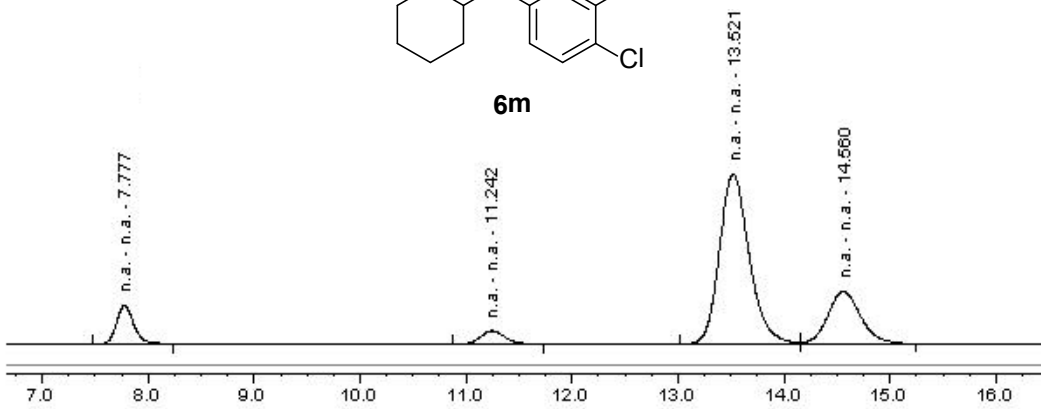

| No.           | Peakname | Ret.Time<br>min | Area<br>mAU*min | Height<br>mAU | Rel.Area<br>%     |
|---------------|----------|-----------------|-----------------|---------------|-------------------|
| 1             | n.a.     | 7.777           | 1.8344          | 9.654         | 8.58              |
| 2             | n.a.     | 11.242          | 0.8885          | 3.321         | 4.16              |
| 3             | n.a.     | 13.521          | 13.9110         | 42.686        | 65.09             |
| 4             | n.a.     | 14.560          | 4.7381          | 13.162        | 22.17             |
| <b>Total:</b> |          |                 | <b>21.3720</b>  |               | <b>100.000000</b> |

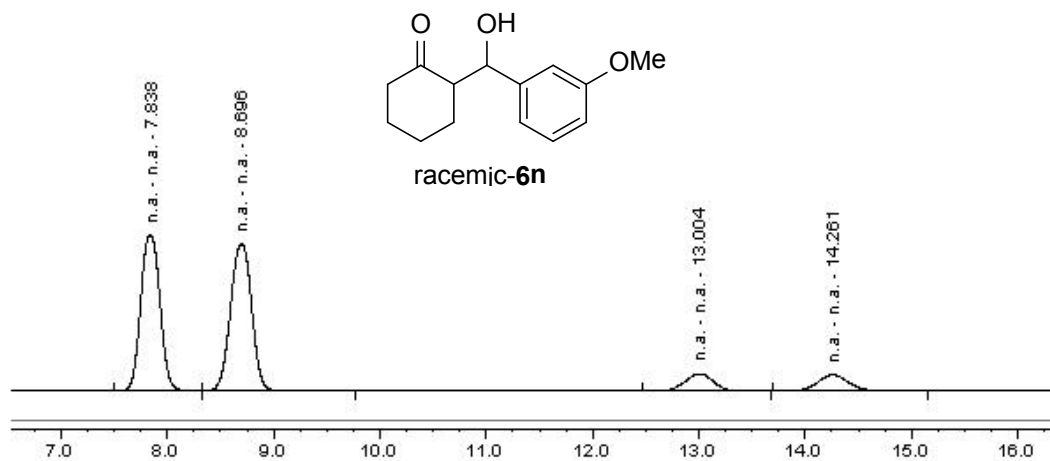

| No.           | Peakname | Ret.Time<br>min | Area<br>mAU*min  | Height<br>mAU | Rel.Area<br>%     |
|---------------|----------|-----------------|------------------|---------------|-------------------|
| 1             | n.a.     | 7.838           | 555.6554         | 2645.655      | 42.11             |
| 2             | n.a.     | 8.696           | 578.7786         | 2501.814      | 43.87             |
| 3             | n.a.     | 13.004          | 92.3822          | 296.052       | 7.00              |
| 4             | n.a.     | 14.261          | 92.5605          | 275.314       | 7.02              |
| <b>Total:</b> |          |                 | <b>1319.3767</b> |               | <b>100.000000</b> |

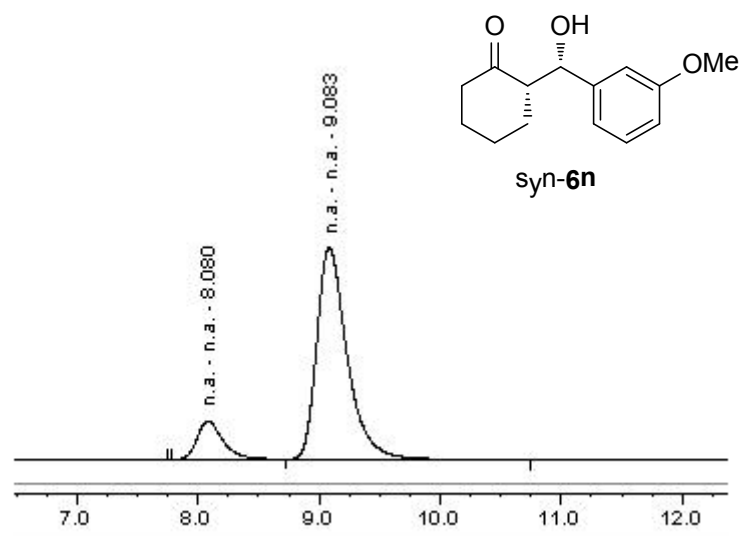

| No.           | Peakname | Ret.Time<br>min | Area<br>mAU*min | Height<br>mAU | Rel.Area<br>%     |
|---------------|----------|-----------------|-----------------|---------------|-------------------|
| 1             | n.a.     | 8.080           | 81.0885         | 328.821       | 13.27             |
| 2             | n.a.     | 9.083           | 530.1940        | 1812.032      | 86.73             |
| <b>Total:</b> |          |                 | <b>611.2825</b> |               | <b>100.000000</b> |

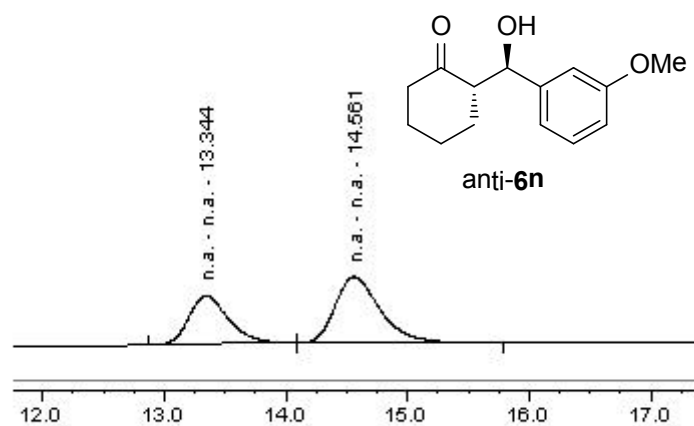

| No.           | Peakname | Ret.Time<br>min | Area<br>mAU*min | Height<br>mAU | Rel.Area<br>%    |
|---------------|----------|-----------------|-----------------|---------------|------------------|
| 1             | n.a.     | 13.344          | 38.3848         | 100.523       | 39.32            |
| 2             | n.a.     | 14.561          | 59.2303         | 137.243       | 60.68            |
| <b>Total:</b> |          |                 | <b>97.6152</b>  |               | <b>100.00000</b> |

### HPLC Chromatograms data for recycle experiments

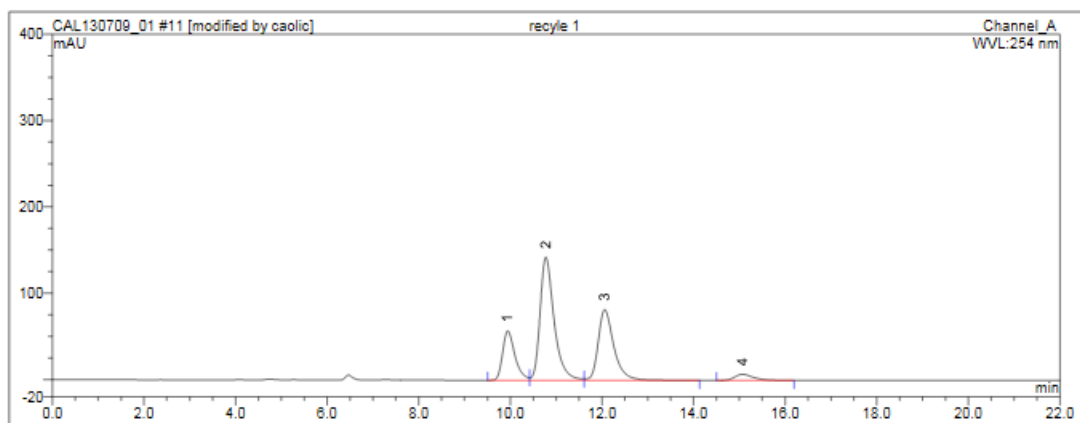

| Peak          | Ret.Time<br>[min] | Peak Name | Rel.Ret.Time<br>(to Main) | Peak Type | Area<br>[mAU*min] | Rel.Area<br>% | Area<br>>=LOQ | Rel.Area<br>>=LOQ |
|---------------|-------------------|-----------|---------------------------|-----------|-------------------|---------------|---------------|-------------------|
| 1             | 9.94              | n.a.      | n.a.                      | BM        | 17.861            | 17.0902       | <LOQ          | <LOQ              |
| 2             | 10.77             | n.a.      | n.a.                      | M         | 50.739            | 48.5484       | <LOQ          | <LOQ              |
| 3             | 12.06             | n.a.      | n.a.                      | MB        | 32.475            | 31.0733       | <LOQ          | <LOQ              |
| 4             | 15.07             | n.a.      | n.a.                      | BMB       | 3.436             | 3.2880        | <LOQ          | <LOQ              |
| <b>Total:</b> |                   |           |                           |           |                   |               | <b>0.00</b>   | <b>0.00</b>       |

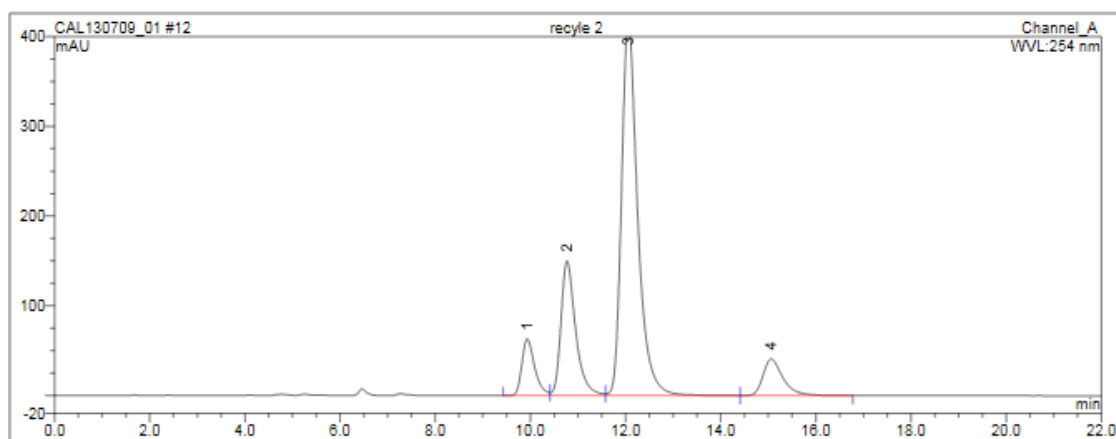

| Peak          | Ret.Time [min] | Peak Name | Rel.Ret.Time (to Main) | Peak Type | Area [mAU*min] | Rel.Area % | Area >=LOQ | Rel.Area >=LOQ |
|---------------|----------------|-----------|------------------------|-----------|----------------|------------|------------|----------------|
| 1             | 9.93           | n.a.      | n.a.                   | BM        | 19.730         | 7.6563     | <LOQ       | <LOQ           |
| 2             | 10.77          | n.a.      | n.a.                   | M         | 53.723         | 20.8475    | <LOQ       | <LOQ           |
| 3             | 12.06          | n.a.      | n.a.                   | M         | 164.386        | 63.7909    | <LOQ       | <LOQ           |
| 4             | 15.06          | n.a.      | n.a.                   | MB        | 19.856         | 7.7053     | <LOQ       | <LOQ           |
| <b>Total:</b> |                |           |                        |           |                |            | 0.00       | 0.00           |

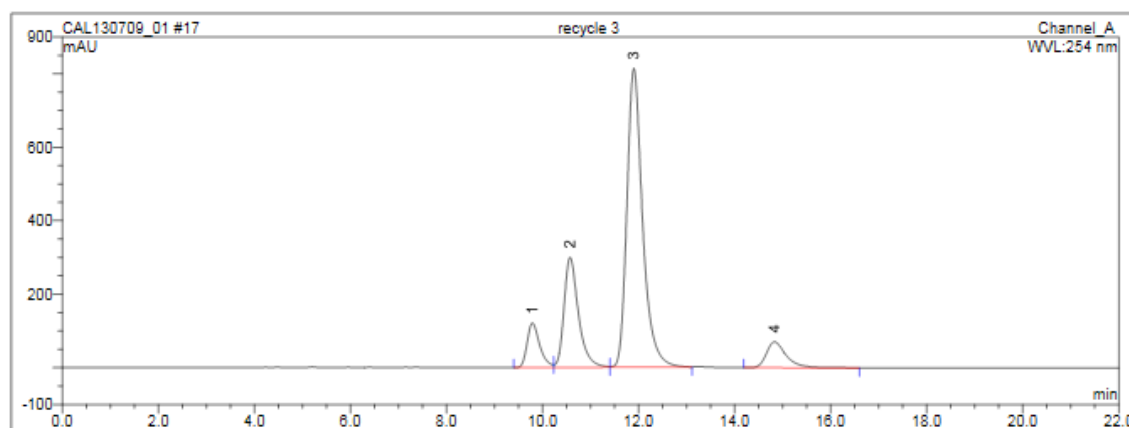

| Peak          | Ret.Time [min] | Peak Name | Rel.Ret.Time (to Main) | Peak Type | Area [mAU*min] | Rel.Area % | Area >=LOQ | Rel.Area >=LOQ |
|---------------|----------------|-----------|------------------------|-----------|----------------|------------|------------|----------------|
| 1             | 9.79           | n.a.      | n.a.                   | BM        | 36.858         | 7.6683     | <LOQ       | <LOQ           |
| 2             | 10.57          | n.a.      | n.a.                   | M         | 104.017        | 21.6407    | <LOQ       | <LOQ           |
| 3             | 11.90          | n.a.      | n.a.                   | MB        | 306.221        | 63.7089    | <LOQ       | <LOQ           |
| 4             | 14.83          | n.a.      | n.a.                   | BMB       | 33.560         | 6.9821     | <LOQ       | <LOQ           |
| <b>Total:</b> |                |           |                        |           |                |            | 0.00       | 0.00           |



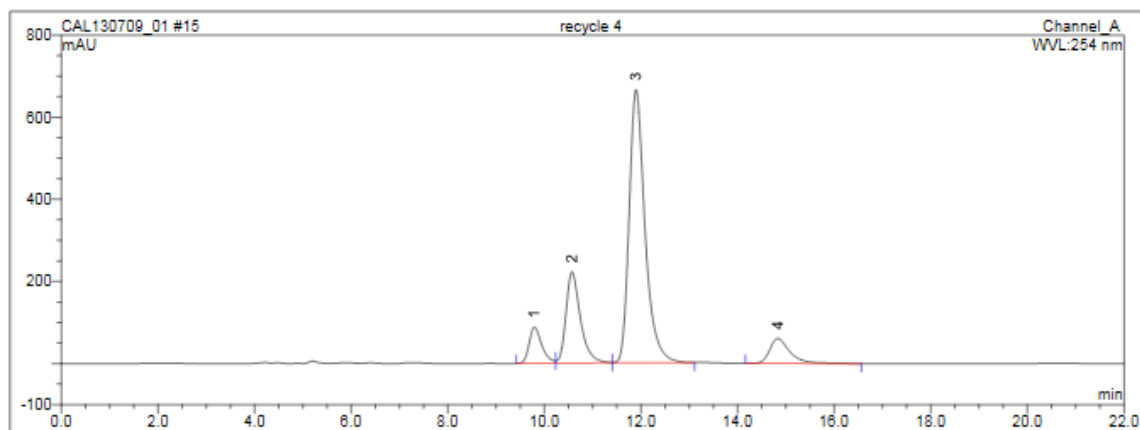

| Peak          | Ret.Time [min] | Peak Name | Rel.Ret.Time (to Main) | Peak Type | Area [mAU*min] | Rel.Area % | Area >=LOQ | Rel.Area >=LOQ |
|---------------|----------------|-----------|------------------------|-----------|----------------|------------|------------|----------------|
| 1             | 9.79           | n.a.      | n.a.                   | BM        | 26.596         | 6.9174     | <LOQ       | <LOQ           |
| 2             | 10.57          | n.a.      | n.a.                   | M         | 77.038         | 20.0367    | <LOQ       | <LOQ           |
| 3             | 11.90          | n.a.      | n.a.                   | MB        | 252.021        | 65.5474    | <LOQ       | <LOQ           |
| 4             | 14.84          | n.a.      | n.a.                   | BMB       | 28.831         | 7.4986     | <LOQ       | <LOQ           |
| <b>Total:</b> |                |           |                        |           |                |            | 0.00       | 0.00           |

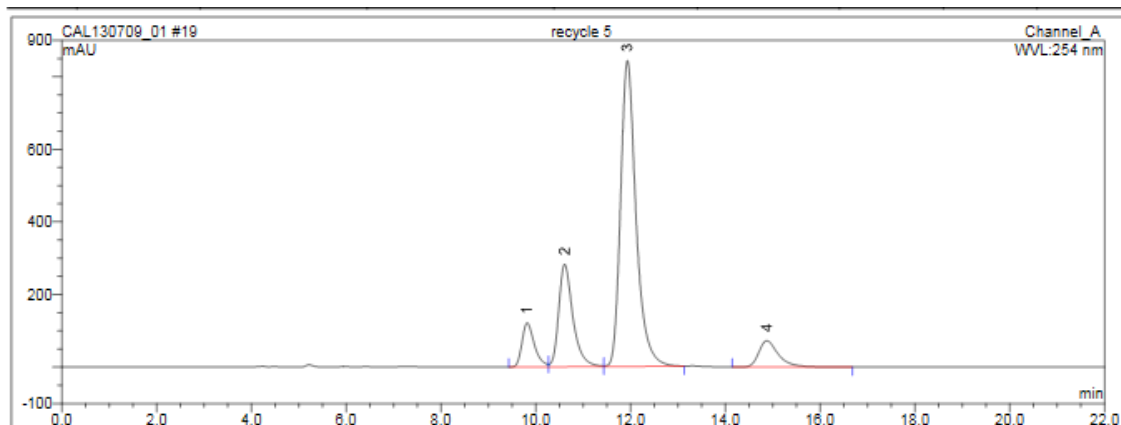

| Peak          | Ret.Time [min] | Peak Name | Rel.Ret.Time (to Main) | Peak Type | Area [mAU*min] | Rel.Area % | Area >=LOQ | Rel.Area >=LOQ |
|---------------|----------------|-----------|------------------------|-----------|----------------|------------|------------|----------------|
| 1             | 9.82           | n.a.      | n.a.                   | BM        | 36.872         | 7.5596     | <LOQ       | <LOQ           |
| 2             | 10.61          | n.a.      | n.a.                   | M         | 97.922         | 20.0763    | <LOQ       | <LOQ           |
| 3             | 11.93          | n.a.      | n.a.                   | MB        | 318.279        | 65.2545    | <LOQ       | <LOQ           |
| 4             | 14.88          | n.a.      | n.a.                   | BMB       | 34.677         | 7.1096     | <LOQ       | <LOQ           |
| <b>Total:</b> |                |           |                        |           |                |            | 0.00       | 0.00           |

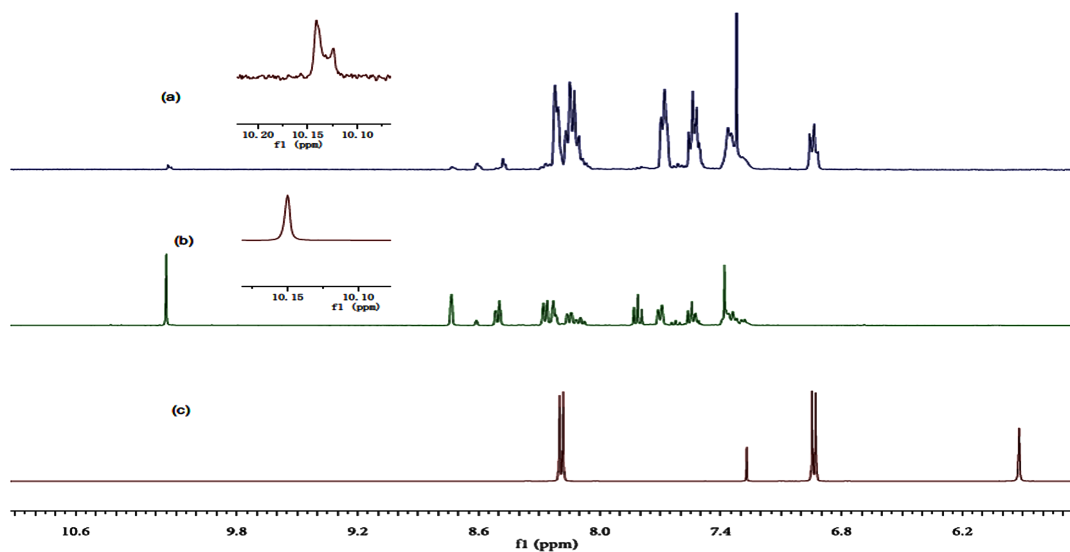

**Fig. 2.**  $^1\text{H}$  NMR spectra for different reaction systems and *p*-nitrophenol. (a) The reaction mixture of 3-nitrobenzaldehyde, cyclohexanone and organocatalyst 2 with *p*-nitrophenol as cocatalyst; (b) The same reaction conditions with (a) without *p*-nitrophenol; (c)  $^1\text{H}$  NMR spectrum of *p*-nitrophenol.

## References

1. Chen J-R, Lu H-H, Li X-Y, Cheng L, Wan J, Xiao W-J (2005) *Org Lett* 7: 4543-4545.
2. Ma, G-N, Bartoszewicz A, Ibrahim I, Córdova A (2011) *Adv Synth Catal* 353: 3114–3122.
3. Kanemitsu A, Umehara A, Miyazaki M, Nagata K, Itoh T (2011) *Chem Eur J* 5: 993-997.
4. Raj M, Parashari GS, Singh VK (2009) *Adv Synth Catal* 351: 1284-1288.
5. Jiang Z-Q, Liang Z, Wu X-Y, Lu Y-X (2006) *Chem Commun* 46: 2801-2803.
6. Miura T, Kasuga H, Imai K, Ina M, Tada N, Imai N, Itoh A (2012) *Org Biomol Chem* 10: 2209–2213.
